# Supplementary material for: Radical substitution with azide: TMSN3–PhI(OAc)2as a substitute of IN3
Source: Royal Society of Chemistry journal article supplement (doi:10.1039/b500037h), 2005-01-01
Supplement: b500037h-esi.doc [file b500037h-esi.doc]

# Supporting information

“Radical substitution with azide: TMSN3/PhI(OAc)2 as a substitute of IN3.” C. M. Pedersen, L. G. Marinescu, M. Bols, (submitted).

**Index:**

Tabel S1.Ratio of products in the substitution of **21** with PhI(OAc)2/TMSN3. S1

Tabel S2.Ratio of products in the substitution of **21** with IN3. S2

Figure S1. Hammett of the log(ratio) versus  for substitution of **21** with PhI(OAc)2/TMSN3. S2

Figure S2. Hammett of the log(ratio) versus  for substitution of **21** with IN3 S2

NMR assignments and other spectral data for known compounds S3-4

1H NMR of compounds **2**-**44** S5-S24

|  | Ratio | log (ratio) |
| --- | --- | --- |
| *p*-OMe | 2.5 | 0.40 |
| *m*-OMe | 0.82 | -0.09 |
| *p*-NO2 | 0.45 | -0.35 |
| *m*-NO2 | 0.52 | -0.29 |
| *p*-Br | 0.78 | -0.11 |
| *m*-Br | 0.63 | -0.20 |
| *m*-Cl | 0.57 | -0.24 |
| H | 1 | 0 |

**Table S1.** Ratio of products in the substitution of **21** with PhI(OAc)2/TMSN3.

|  | Ratio | log (ratio) |
| --- | --- | --- |
| *p*-OMe | 2 | 0.30 |
| *m*-MeO | 0.91 | -0.04 |
| *p*-NO2 | 0.51 | -0.29 |
| *p*-Br | 0.85 | -0.07 |
| *m*-Br | 0.67 | -0.17 |
| *m*-Cl | 0.71 | -0.15 |
| H | 1 | 0 |

**Table S2.** Ratio of products in the substitution of **21** with IN3.

**Figure S1.** Hammett of the log(ratio) versus  for substitution of **21** with PhI(OAc)2/TMSN3.

**Figure S2.** Hammett of the log(ratio) versus  for substitution of **21** with IN3.

**NMR assignments and other spectral data for known compounds:**

**2**: 1H NMR: δ 7.22 - 7.38 (m, 5H), 5.24 (s, 1H), 3.43 (s, 3H).

**4**: 1H NMR(400 MHz, CDCl3): *δ*= 7.48-7.38 (m, 10H, Ph); 5.66 (s, 1H, PhC**H**); 5.58 (s, 1H, PhC**H**’); 5.49 (d, 1H, *J*H1,H2=3.6 Hz, H1); 5.11 (d, 1H, *J*H1’,H2’=3.6 Hz, H1’); 5.03 (dd, 1H, *J*H2,H1=3.6 Hz, *J*H2,H3=8.4 Hz, H2); 4.94 (dd, 1H, *J*H1’,H2’=3.6 Hz, *J*H2’,H3’=8 Hz, H2’); 4.47-4.22 (m, 5H, H3, H3’, H4, H4’, H5b’); 4.12 (d, 1H, *J*gem=13.6 Hz, H5a) 4.01 (d, 1H, *J*=13.2 Hz, H5a’); 3.85 (dd, 1H, *J*H5b,H4=3.2 Hz, *J*gem=13.6 Hz, H5b); 2.17 (s, 3H, CO**Me**); 2.05 (s, 3H, CO**Me**); 1.57 (s, 3H, Me); 1.54 (s, 3H, Me’); 1.38 (s, 3H, Me); 1.36 (s, 3H, Me’). 13C NMR(100 MHz, CDCl3): *δ*= 169.6 (**C**OMe); 169.3 (Ac); 135.2, 135.2, 128.6, 128.5, 127.8, 127.7, 125.2, 124.9 (Ph); 108.6 (2x**C**Me2); 94.6 (C1); 92.6 (C1); 90.2 (Ph**C**H2); 86.7 (Ph**C**H2); 72.2, 72.1, 71.6, 71.6, 70.8, 70.5, 58.8, 58.6 (2x(C2, C3, C4, C5)); 26.9 (Me); 26.9 (Me); 25.3 (Me); 25.2 (Me); 19.9 (CO**Me**); 19.8 (CO**Me**). IR (NaCl) / cm-1: = 3065, 3033 (Ar C-H sp2), 2987, 2936, 2878 (C-H sp3), 2111(vs) (N3), 1740(vs) (C=O). MS(ES): calc. for (M + Na)= 386.1328, found 386.1322.

**6**: 1H NMR (CDCl3, 400 MHz): *δ* 7.45-7.36 (5H, m, Ar-**H**), 5.39 (1H, s, O-C**H**N3-Ar), 4.19 (2H, br. s, H-1,5), 4.13 (1H, t, H-3, *J* = 4,4 Hz), 2.22-1.78 (8H, m, 2H-2,4,6,7), 1.46 (9H, s, (C**H**3)3, Boc). 13C NMR (CDCl3, 100 MHz): *δ* 153.6 (**C**=O, Boc), 137.5 (**C**(Ar)), 129.3; 129.2; 128.9 (**C**H(Ar)), 91.5 (O-**C**HN3-Ar), 79.4 (**C**(CH3)3, Boc), 72.4 (**C**3), 53.1/52.3 (**C**1,5), 37.2/36.4 (**C**2,4), 35.3/34.4 (**C**6,7), 28.7/28.0 ((**C**H3)3C, Boc). IR (NaCl) / cm-1:  = 3444, 2978 (C-H sp3), 2103 (N3), 1694, 1652, 1548 cm-1.

**8**: 1H-NMR (CDCl3): δ = 7.34-7.51 (m, 10 H, Ar), 5.529 (s, 1H, Ar-C**H**-N3), 4.93 (d, 1 Ha, J = 11.6, Ar-C**H**2), 4.73 (d, 1 Hb, J = 11.6, Ar-C**H**2). 13C-NMR (CDCl3): δ = 136.9 (1 C, Ar C1), 129.3-126.3 (11 C, Ar), 91.5 ( Ar-**C**H-N3), 70.4 (Ar-**C**H2). IR (KBr) / cm-1:  = 3033/3065 (C-H sp2), 2874 (C-H sp3), 2105 (-N3), 1495,1587 (Ar), MS(ES): calc. for (M + Na)= 262.0956, found 262.0950

**24b**: 1H-NMR (CDCl3): δ = 7.35-7.27 (m, 5H, Ar), 6.36 (dt, J=1.1, J=12.7, 0.67 H, H4E), 5.95 (dt, J=1.5, J=6.3, 0.33 H, H4Z), 4.75 (dt, J=7.4, J=12.7, 0.67 H, H3E), 4.53 (s, 2H, PhC**H**2-), 3.43 (dt, J=6.4, J=7.3, 0.33 H, H3Z), 3.59 (s, 1H, MeZ), 3.51 (s, 2H, MeE), 3.48 (t, J=6.9, 0.66H, H1Z), 3.46 (t, J=6.9, 1.44H, H1E), 2.40 (dk, J=1.4, J=6.9, 0.66 H, H2Z), 2.25 (dk, J=1.2, J=7.0, 1.44 H, H2E). 13C-NMR (CDCl3): δ = 148.6 (C4E), 147.6 (C4Z), 138.7(Ar-1Z), 138.8 (Ar-1E), 128.5-127.6 (10 Ar), 102.9 (C3Z), 99.2 (C3z), 73.1 (Ph**C**H2E), 73.0 (Ph**C**H2Z), 71.3 (C1E), 70.2 (C1Z), 59.8 (MeZ), 59.1 (MeE), 28.6 (C2E), 24.8 (C2Z).

**30**: 1H NMR (400 MHz, CDCl3): δ 5.28 (bs, 1H), 3.2 (q, 2H, *J* = 8.0 Hz), 1.52-1.44 (m, 2H), 1.29-1.21 (m, 8H), 0.84 (t, 3H, *J* = 7.2 Hz). 13C-NMR (100 MHz, CDCl3): δ 156.6 (**C**=O), 41.3 (**C**1), 31.8 (**C**5), 29.6 (**C**2), 29.05 (**C**4), 26.8 (**C**3), 22.7 (**C**6), 14.1 (**C**7).IR (KBr) / cm-1: 1702 (C=O), 2139.7 (N3), 2858/2929 (C-H sp3), 3331.8 (NH).

**32**: mp = 85.5 oC.1H NMR (400 MHz, CDCl3): δ = 7.25-7.10 (m, 5H), 4.99 (bs, 1H), 3.42 (q, 2H, *J* = 6.7 Hz), 2.75 (t, 2H). 13C-NMR (100 MHz, CDCl3): δ 155.4 (**C**=O), 137.1 (Ar **C**1), 127.6 (Ar **C**3,4,5), 125.6 (Ar **C**2,6), 41.1 (**C**H2-NH), 34.5 (**C**H2).IR (KBr) / cm-1: 1543 (N-C=O), 1671.8 (strong C=O), 2141.9 (N3), 2930.2 (C-H sp3), 3029 (C-H sp2) 3280.3 (NH).

MS(ES): calc. for (M + Na)= 213.0752, found 213.0758.

**34**: 1H NMR (400 MHz, CDCl3): δ = 7.4 (m, 3H), 7.1 (m, 2H), 7 (bs, 1H). 13C-NMR (100 MHz, CDCl3): δ 154.5 (**C**=O), 137.1 (Ar **C**1), 129.3 (Ar **C**3,5), 124.9 (Ar **C**4), 119.7 (Ar **C**2,6).IR (KBr) / cm-1: 1554 (N-C=O), 1688.6 (strong C=O), 2147.4 (N3), 3325.6 (NH). MS(ES): calc. for (M + Na)= 185.0439, found 185.0443.

**36**: mp = 130.7 oC.1H NMR (400 MHz, CDCl3): δ = 7.2 (d, 2H, *J* = 8.0 Hz), 7 (d, 2H, *J* = 8.0 Hz), 6.7 (bs, 1H), 2.2 (s,3H).13C NMR (100 MHz, CDCl3): δ = 154.2 (**C**=O), 134.6 (Ar **C**1), 129.8 (Ar **C**3,4,5), 119.6 (Ar **C**2,6), 21.03 (**C**H3).IR (KBr) / cm-1: 3276 (NH), 2143, (medium, N3 ), 1682 (strong, C=O), 1538 (N-C=O). MS(ES): calc. for (M + Na)= 199.0595, found 199.0594

**40**: 1H-NMR (CDCl3): δ = 7.33 (d, J=6.9, 2H, Ar-3/Ar-3’), 7.00 (bs, 1H, NH), 6.85 (d, J=6.9, 2H, Ar-2/Ar-2’), 3.78 (s, 3H, OMe). 13C-NMR (CDCl3): δ = 156.9 (**C**=O), 154.4 (Ar-1), 130.2 (Ar-4), 121.5 (Ar-3/Ar-3’),114.5 (Ar-2/Ar-2’), 55.7 (O**C**H3). IR (NaCl) / cm-1: = 3292(s) (NH), 3204, 3141, 3081 (Ar- C-H sp2), 2996, 2955, 2835 (C-H sp3), 2147(vs) (N3), 1702(vs), 1674(vs) (C=O), 1610, 1557, 1511 (Ar C-H). MS(ES): calc. for (M + Na)= 215.0545, found 215.0549

**44**: 1H-NMR (CDCl3): δ = 8.01 (m, 2H, Ar), 7.52(m, 1H, Ar), 7.40 (m, 2H, Ar), 4.34 (t, J=6.3, 2H, CH2-O-), 3.54 (t, J=7.0, 2H, -CH2N). 13C-NMR (50 MHz) (CDCl3): δ = 166.4 (**C**=O), 133.4, 129.9, 128.6 (Ar), 63.8 (CH2O), 50.1 (CH2N). IR (NaCl) / cm-1: = 3064 (Ar C-H sp3), 2956 (C-H sp3), 2103(vs) (N3), 1723(vs) (C=O), 1602, 1584, 1492 (Ar). MS(ES): calc. for (M + Na)= 214.0593, found 214.0596


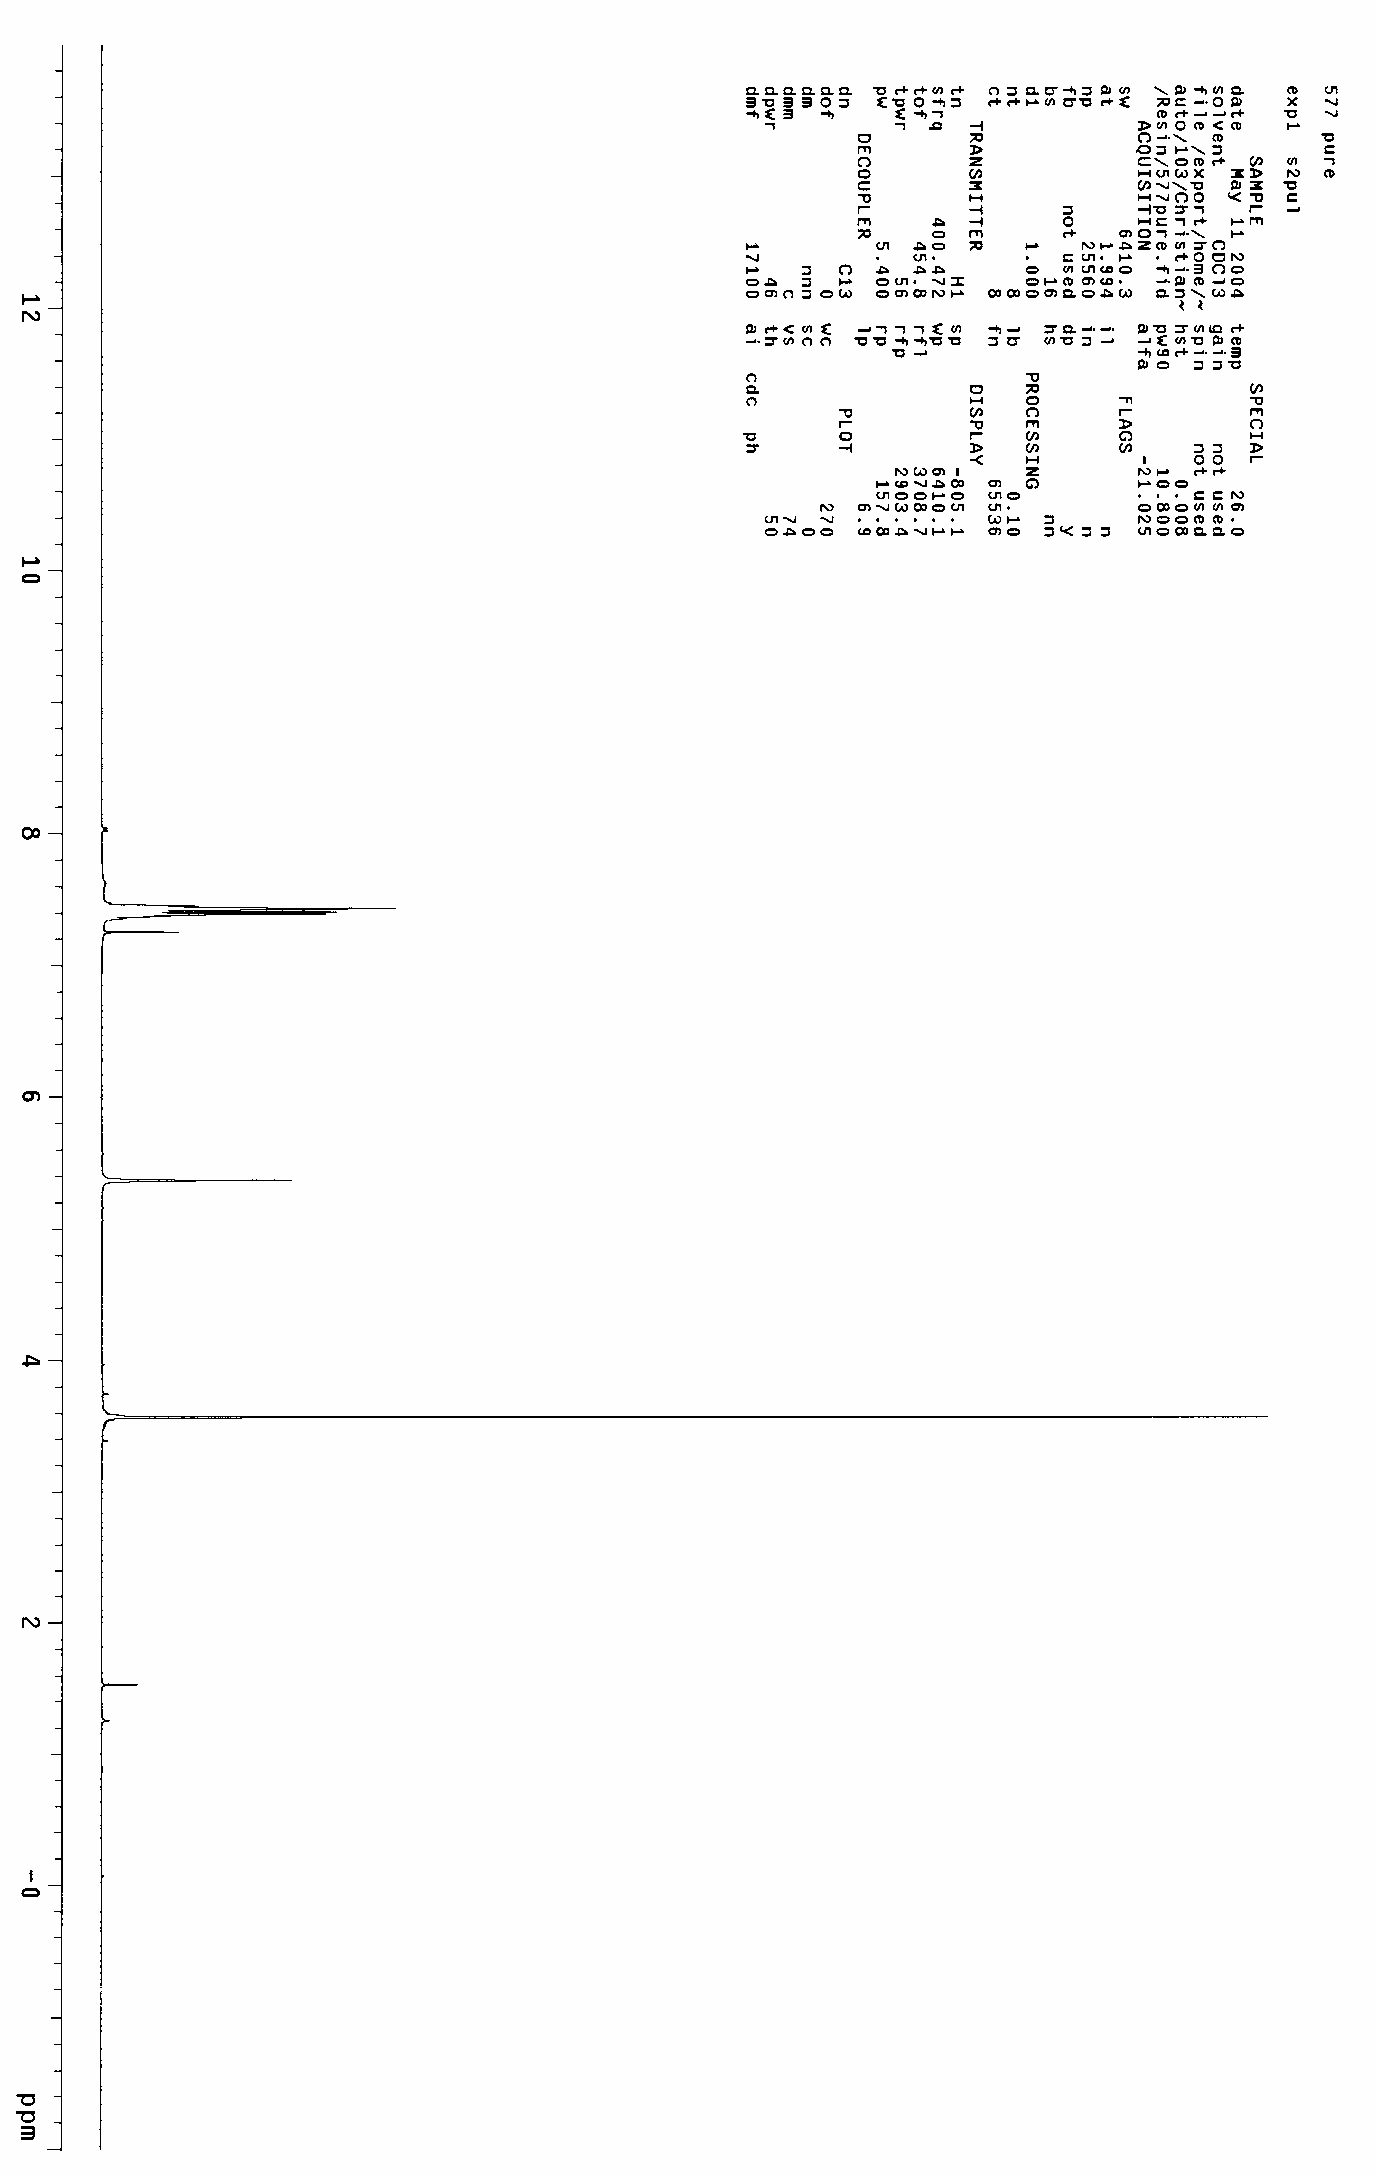


**2**


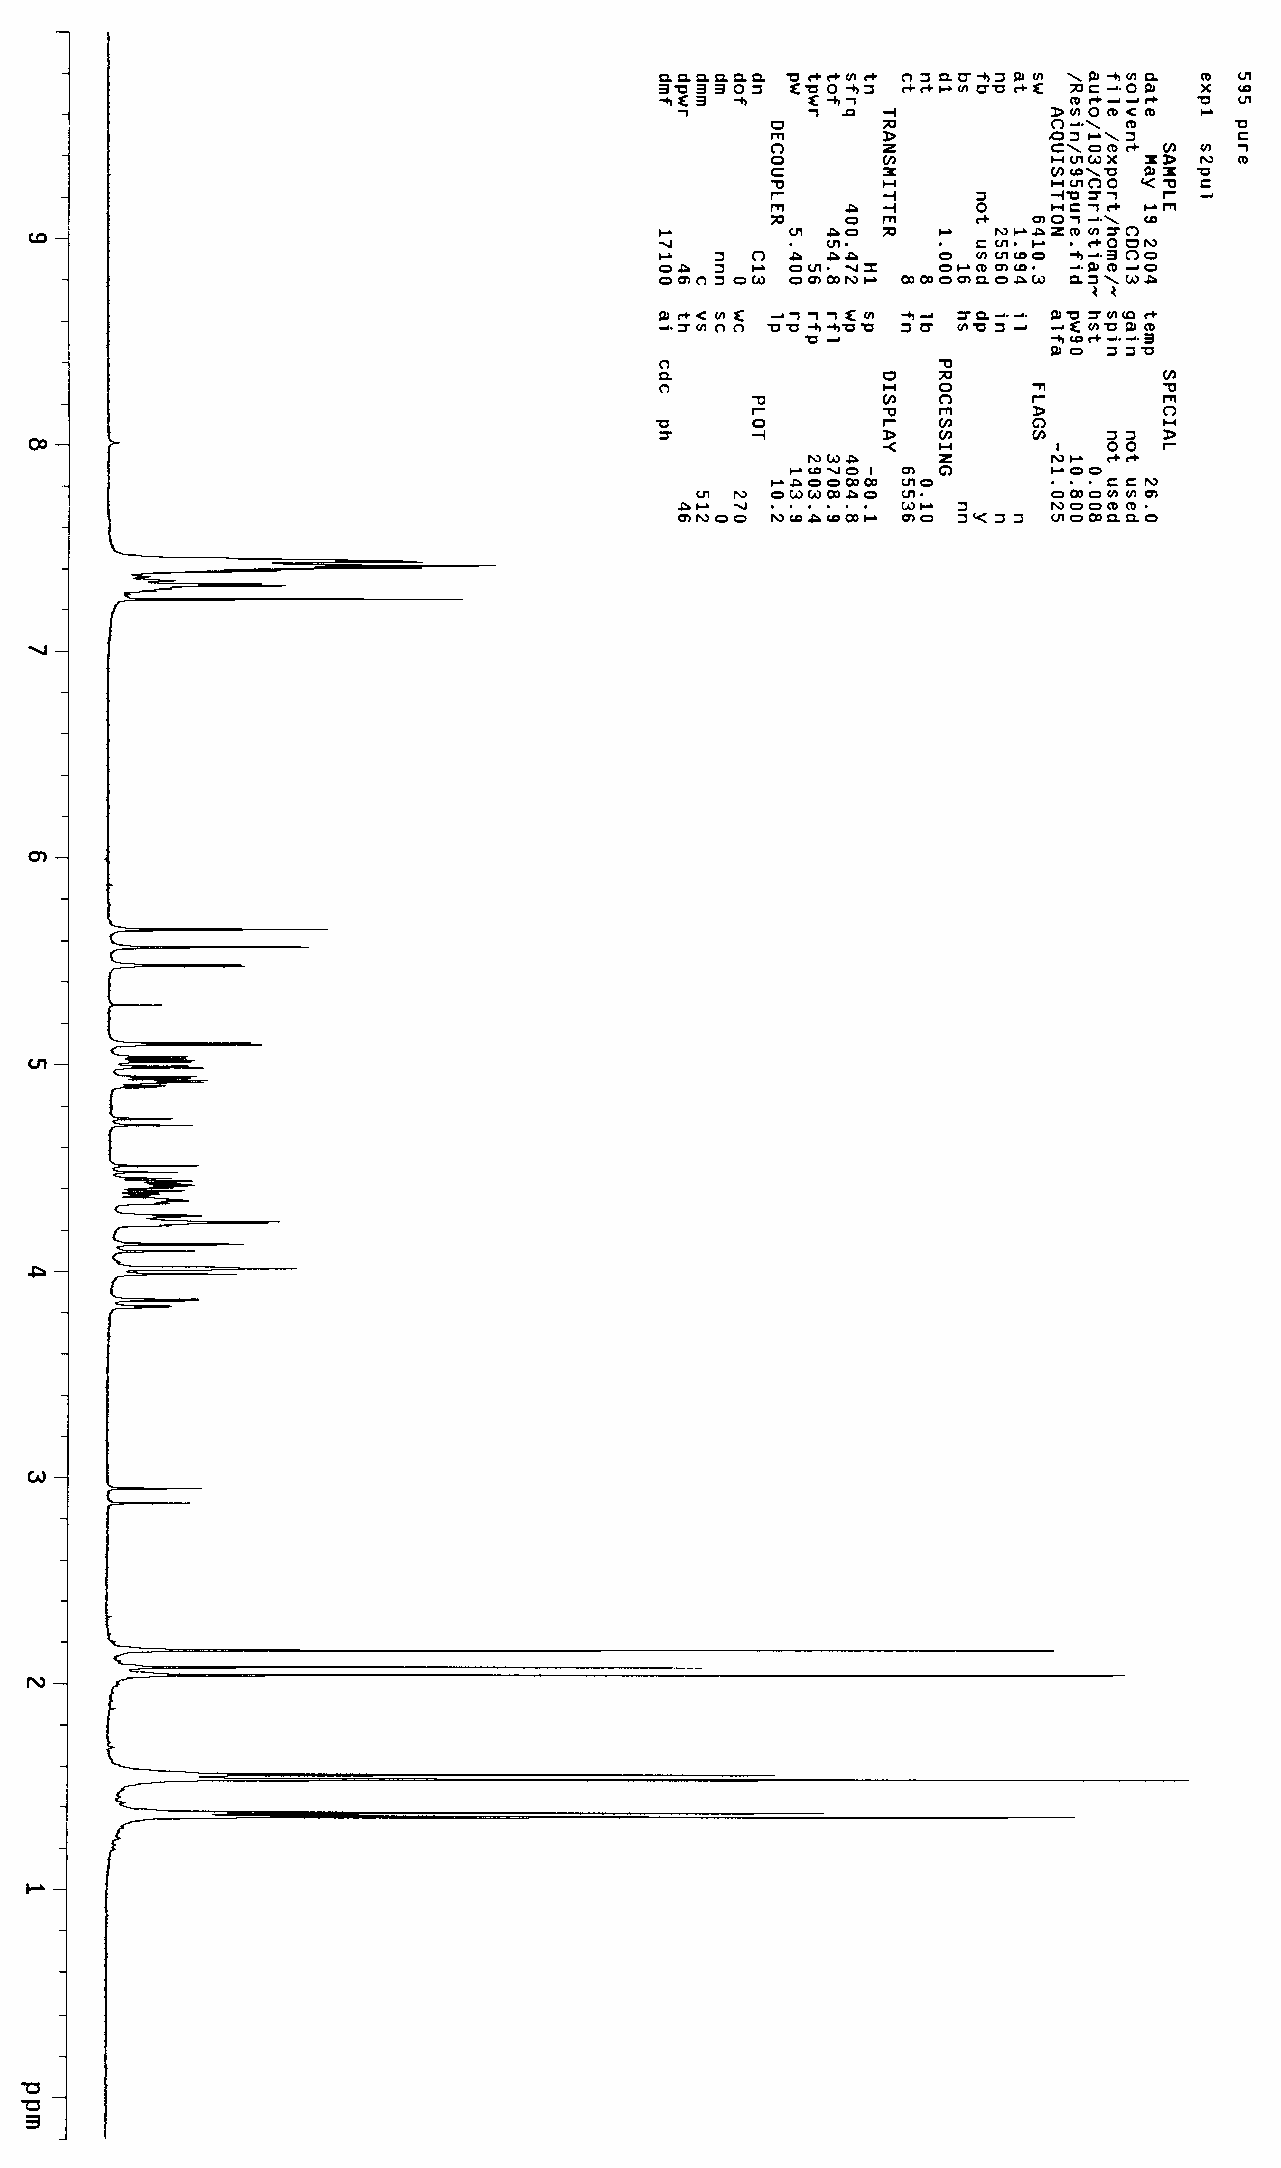


4


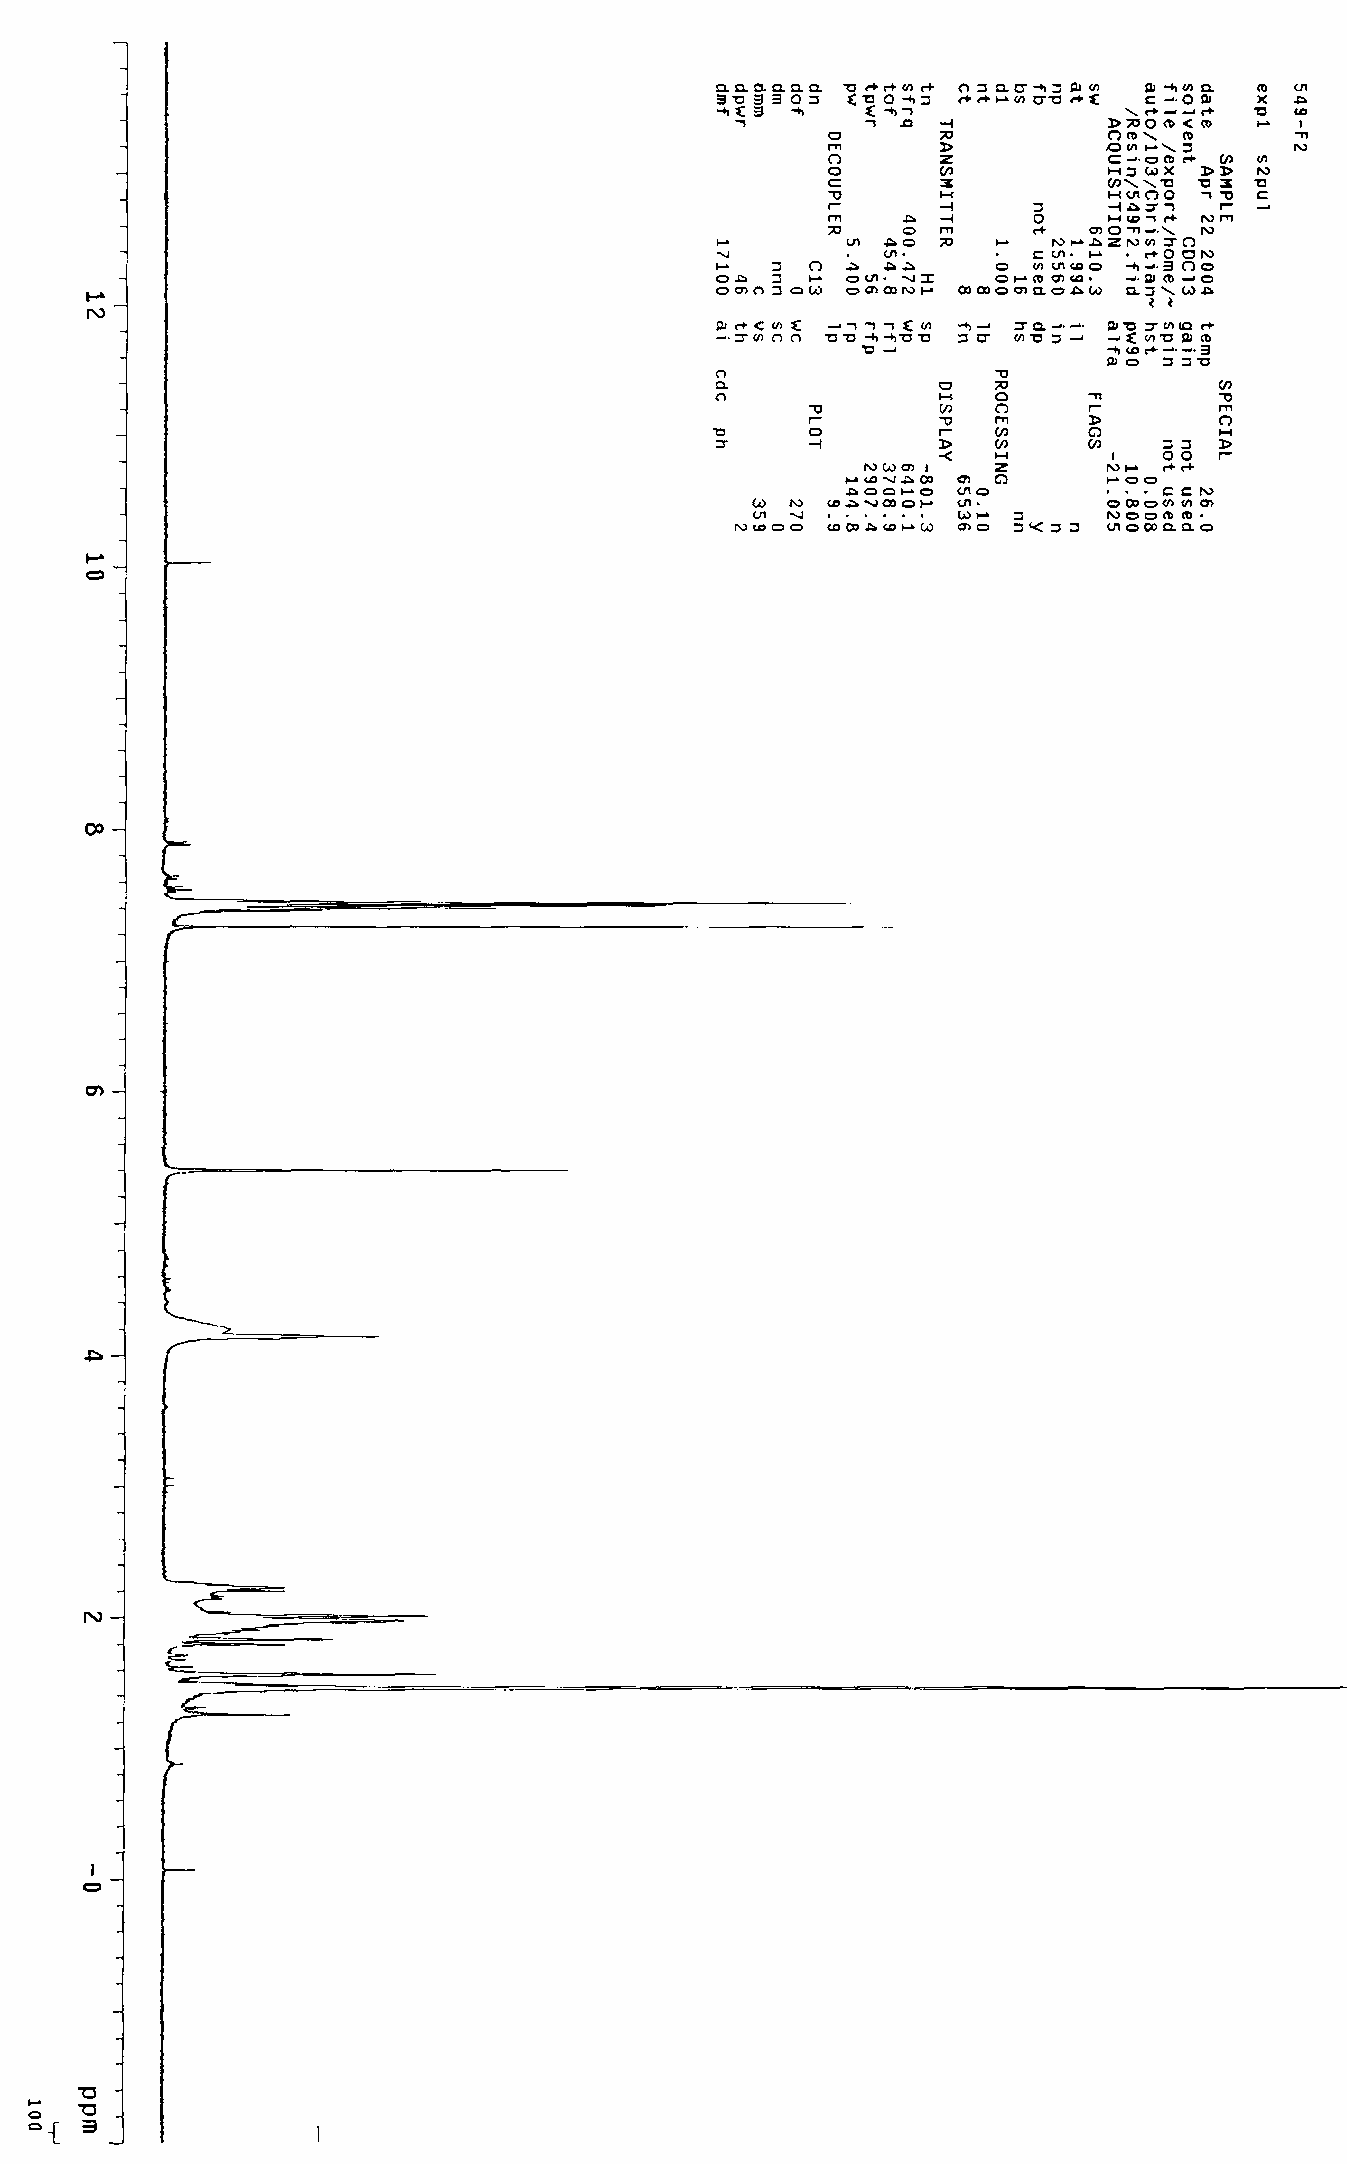


**6**


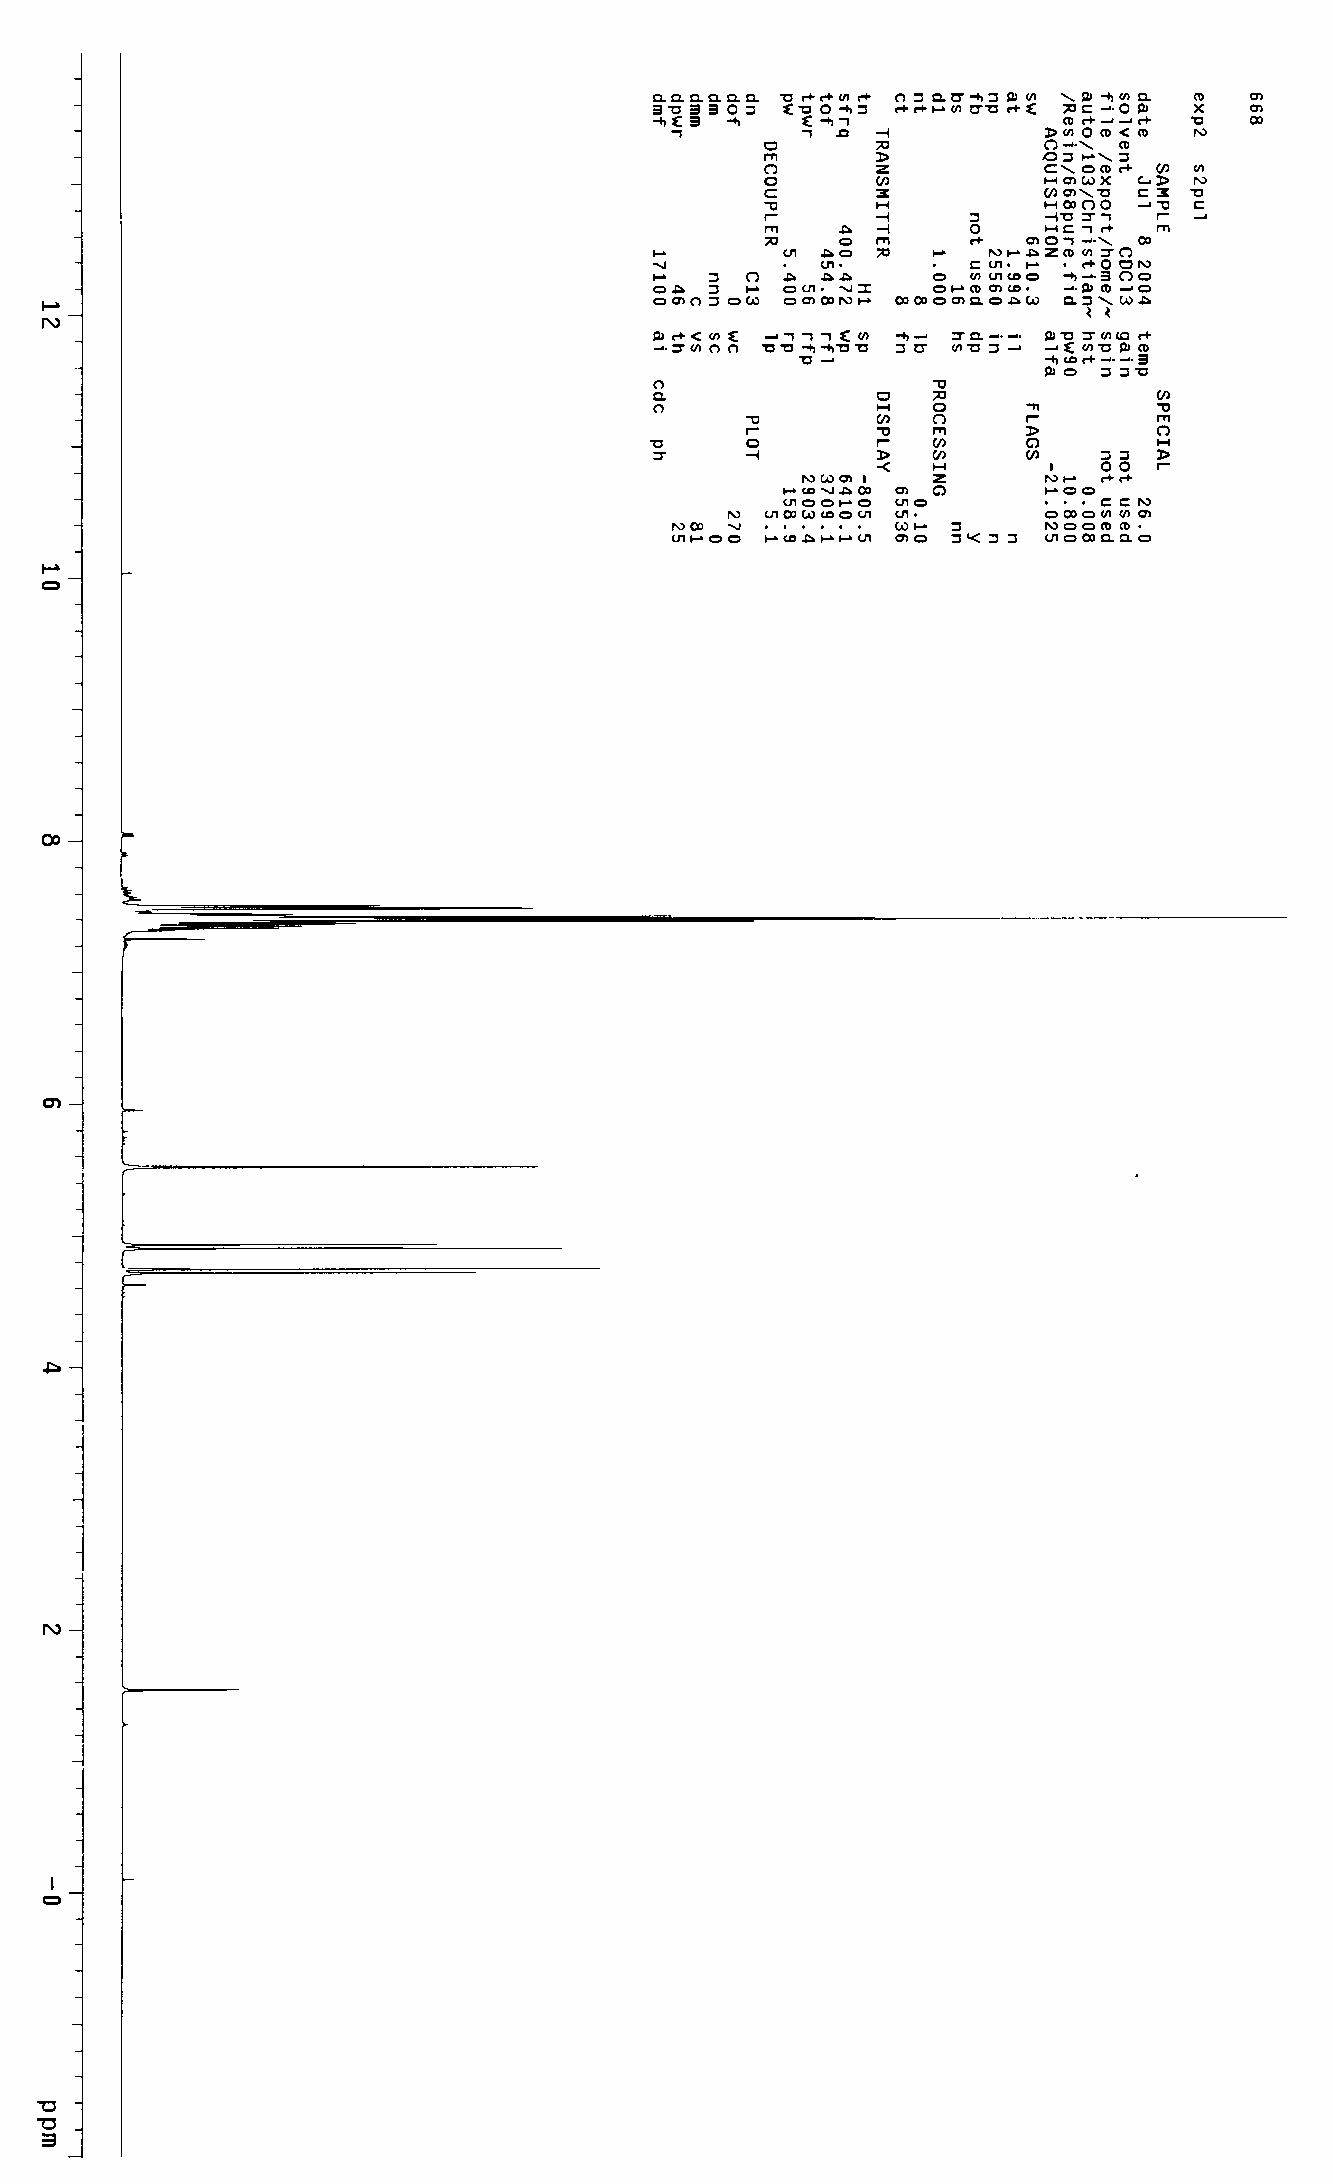


**8**


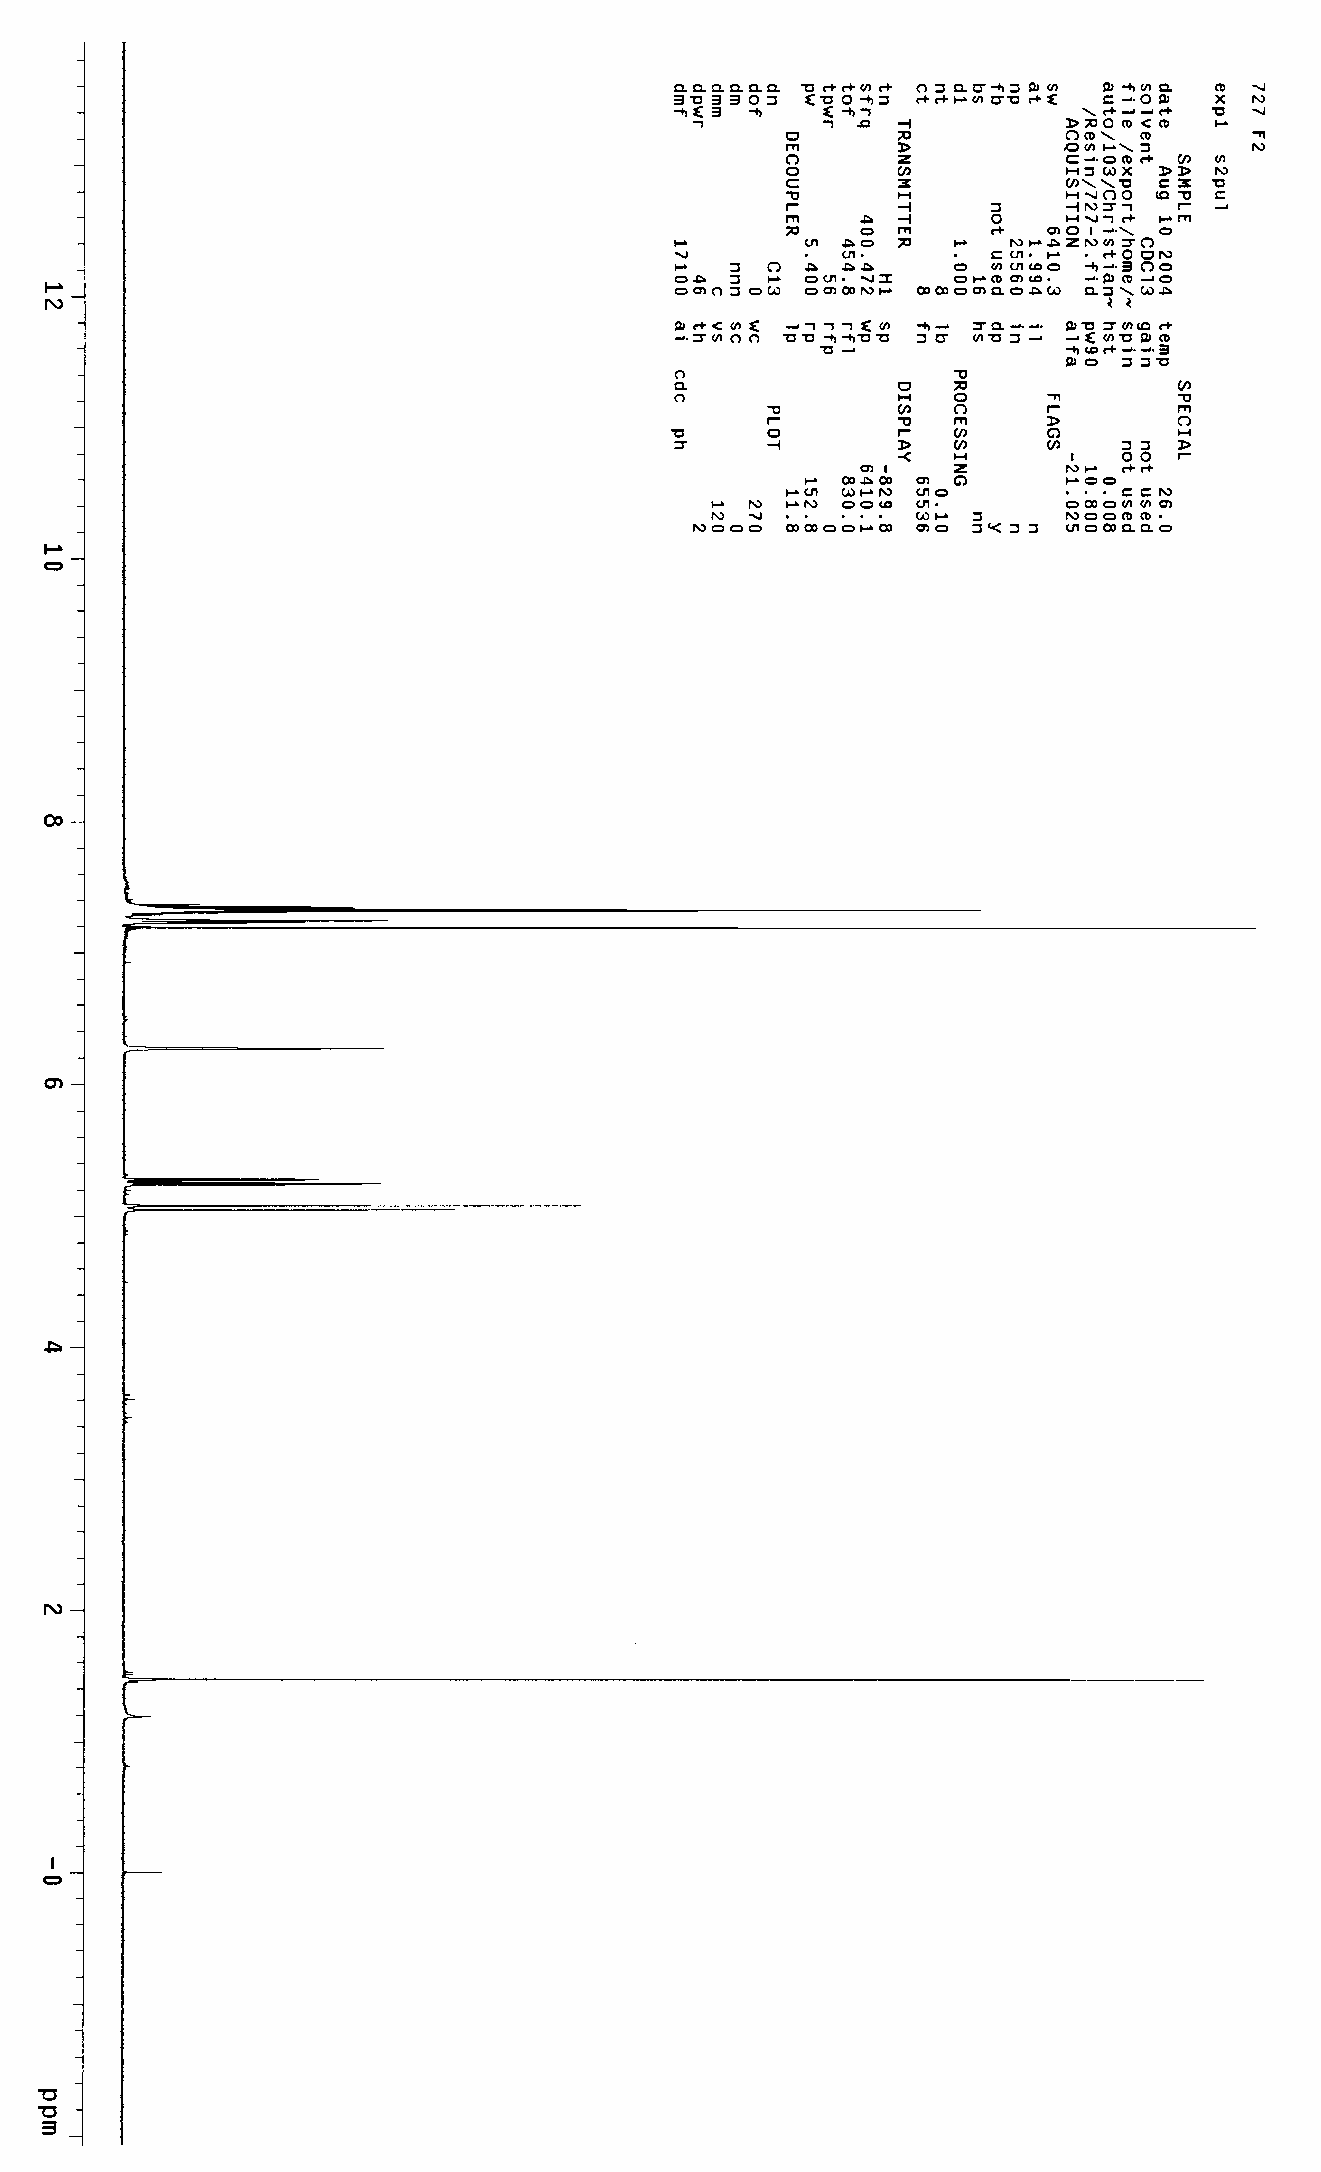


**10**


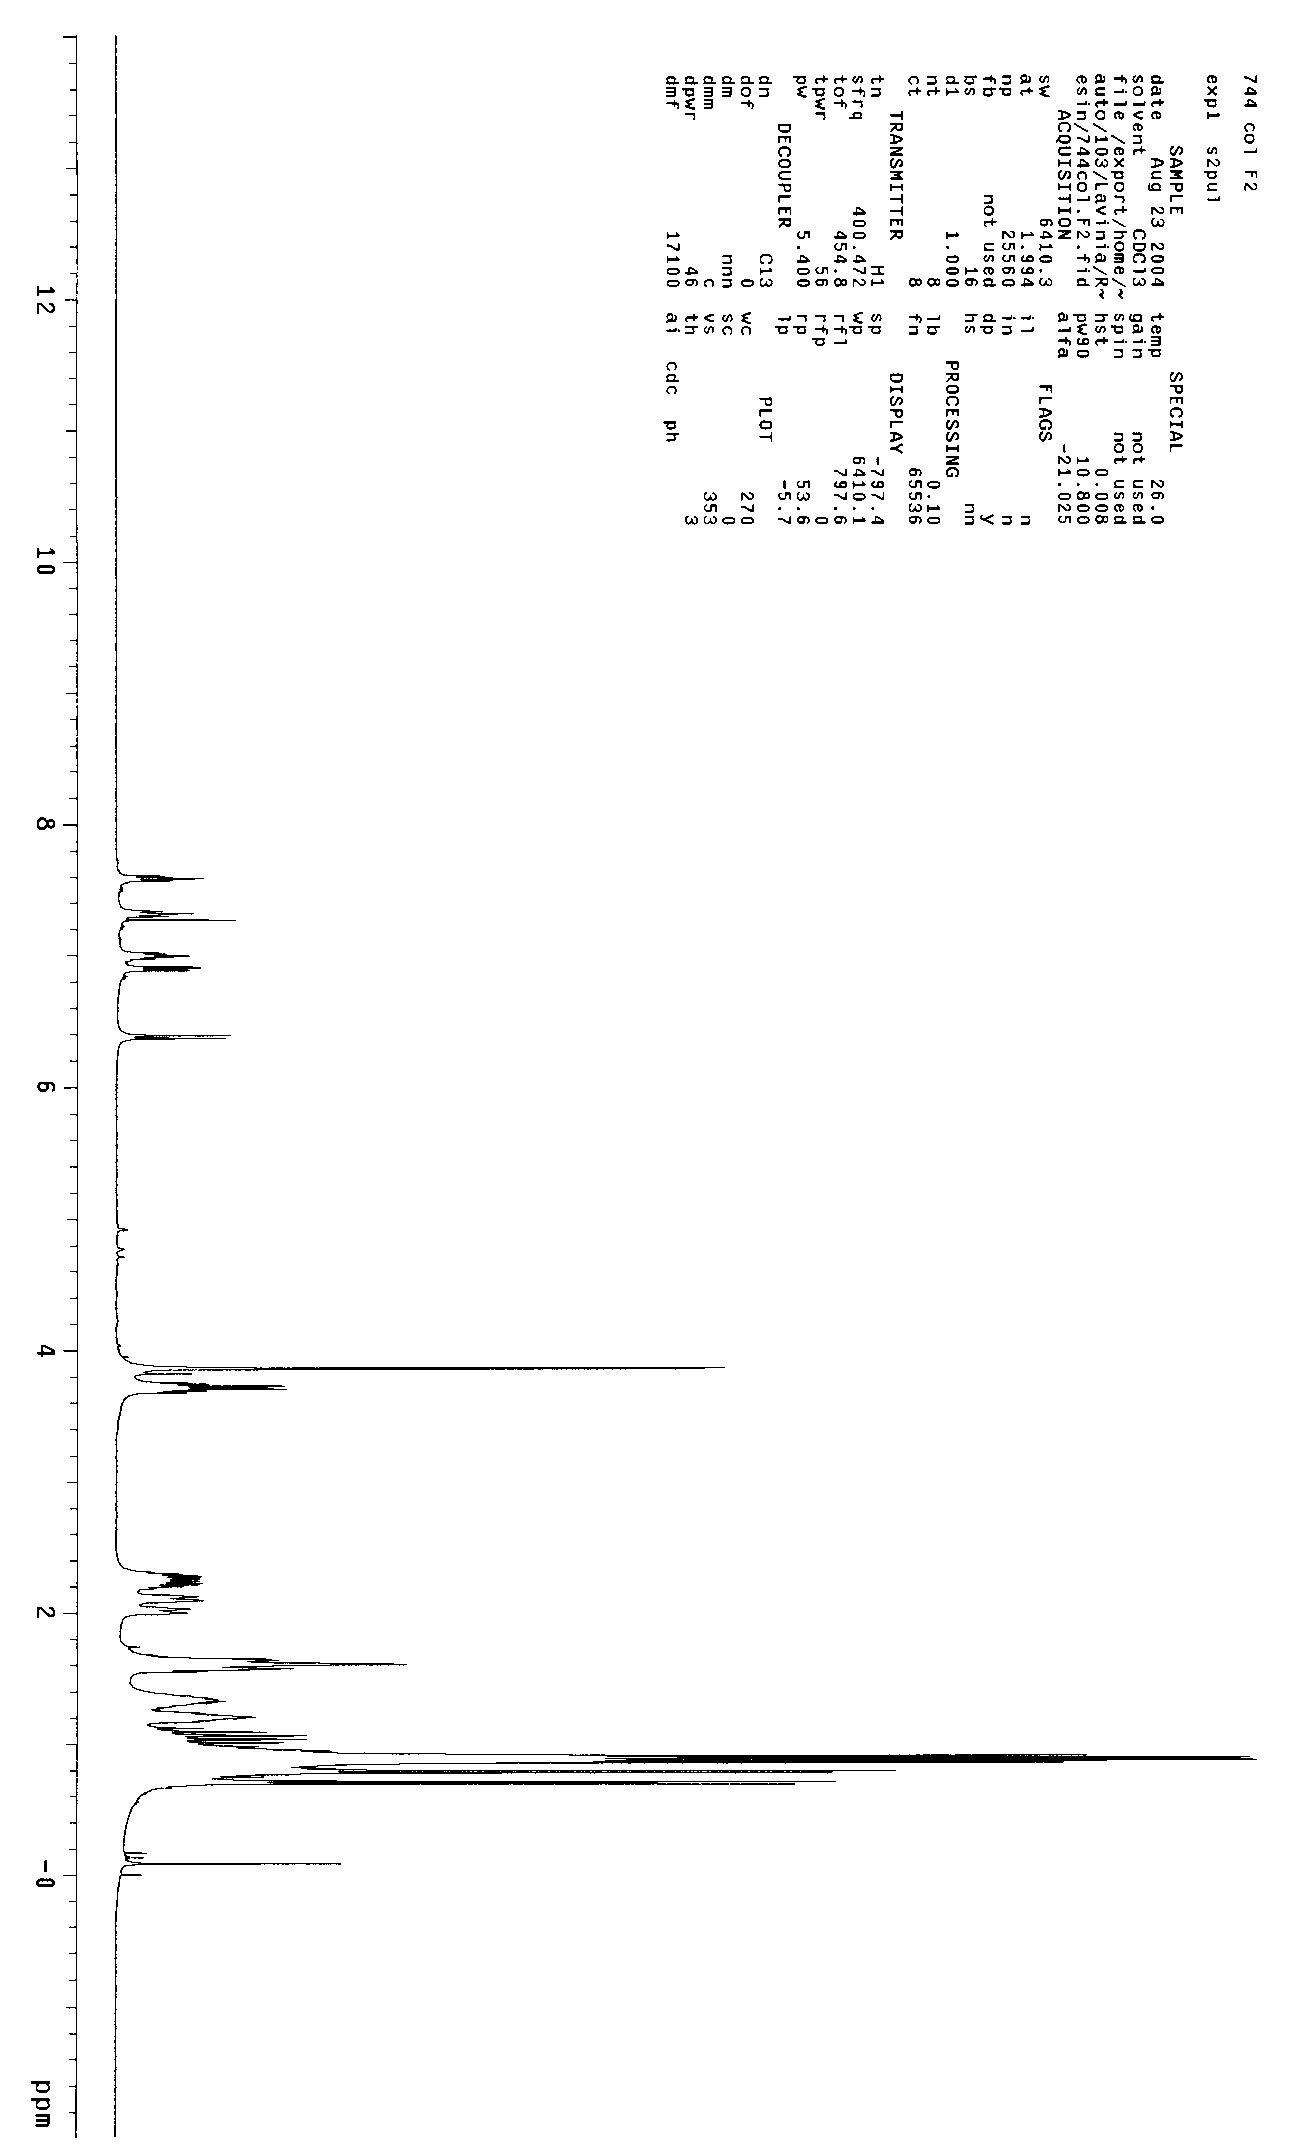


**12**


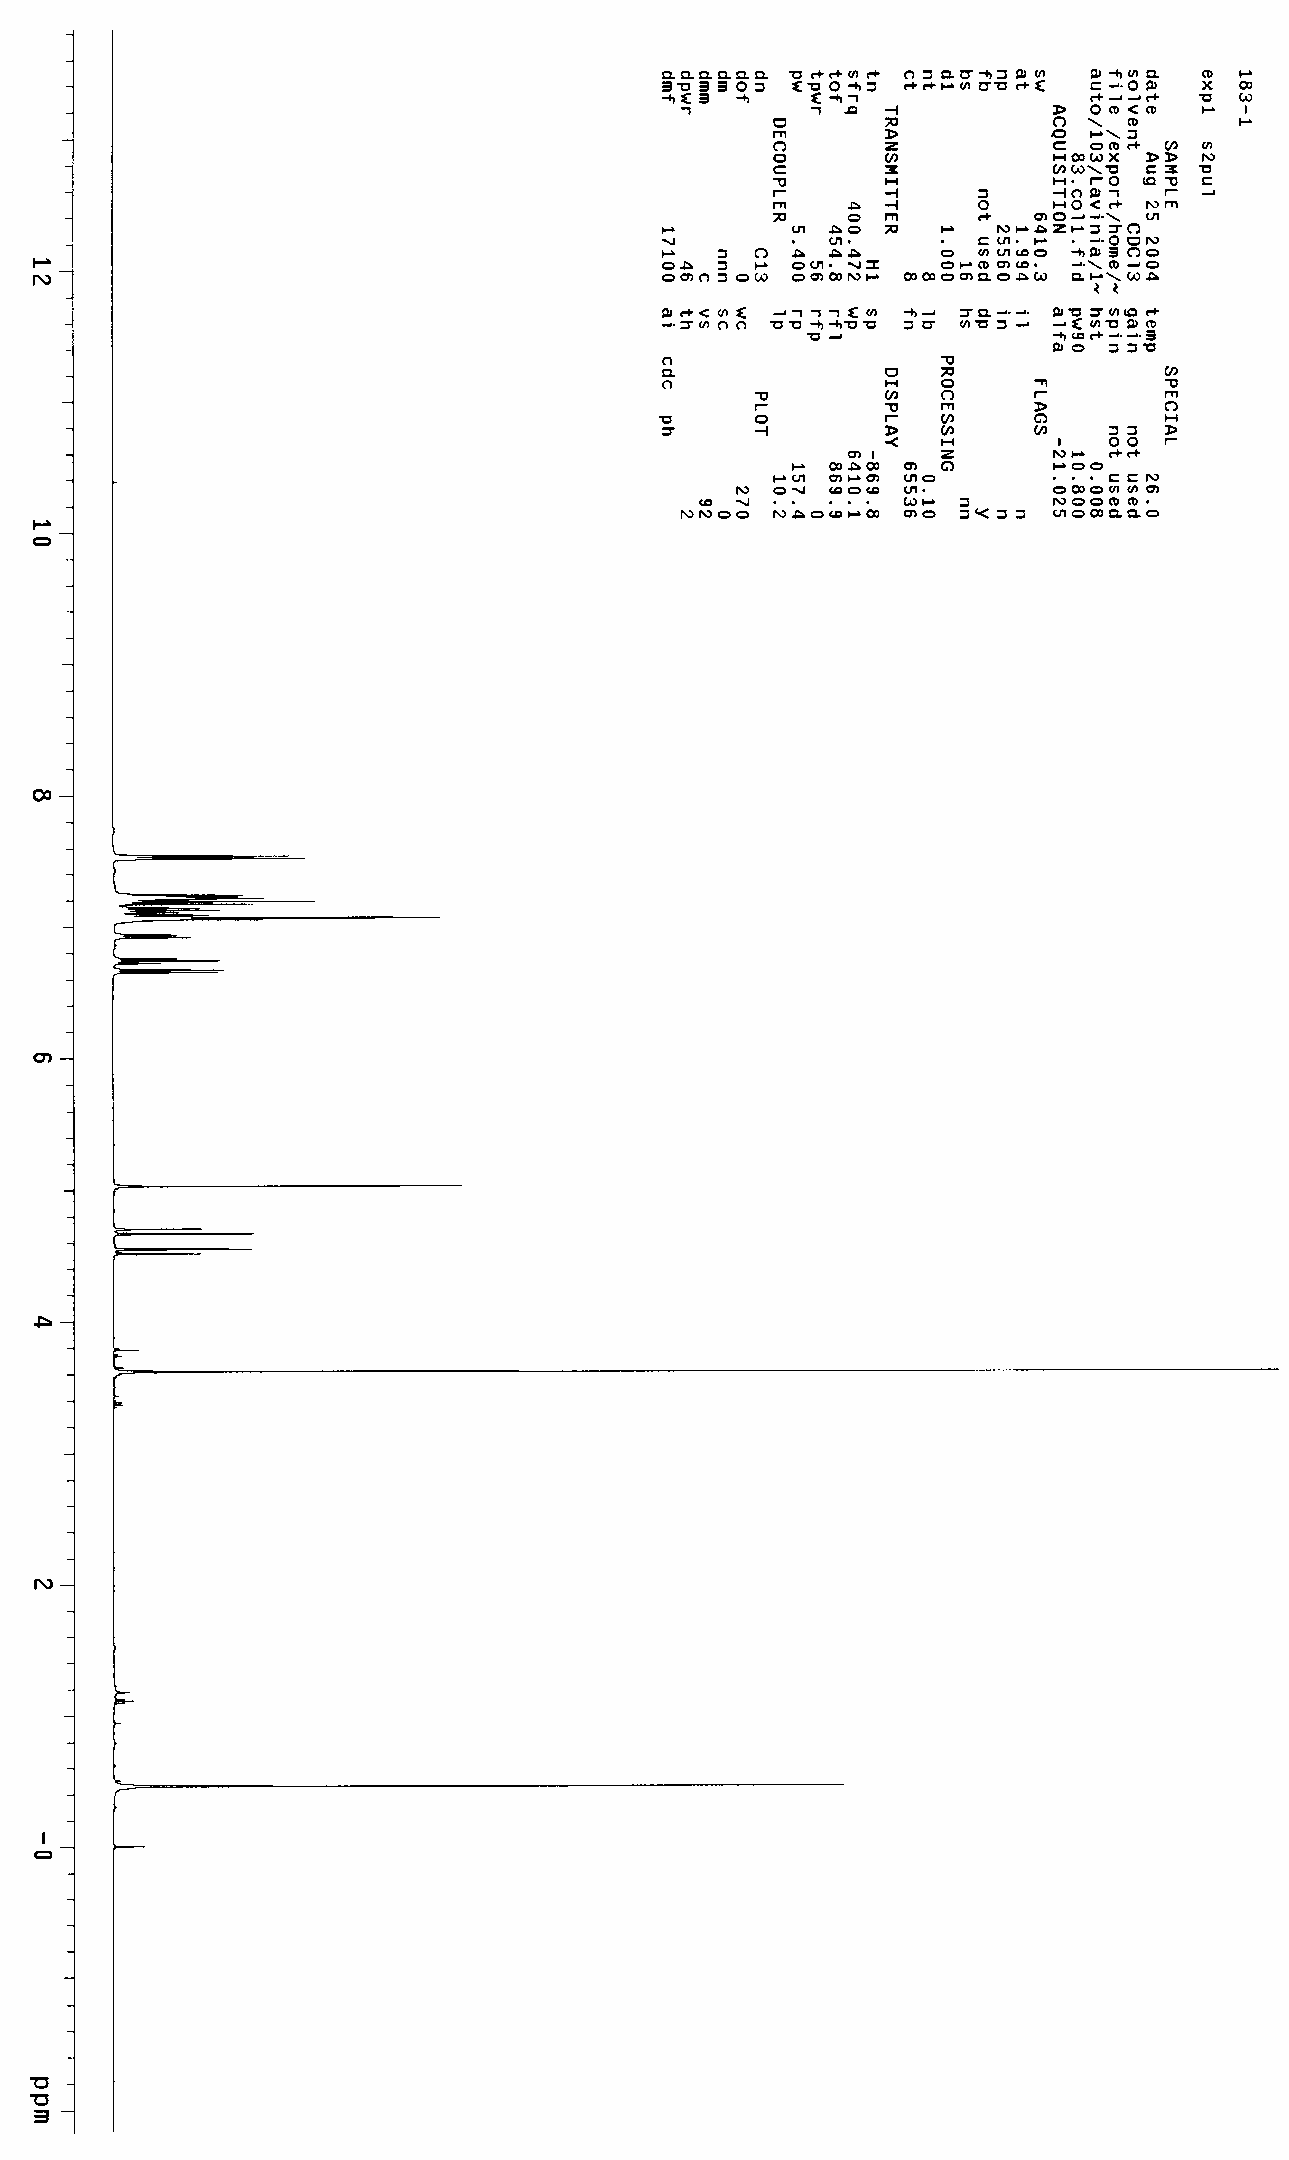


**13**


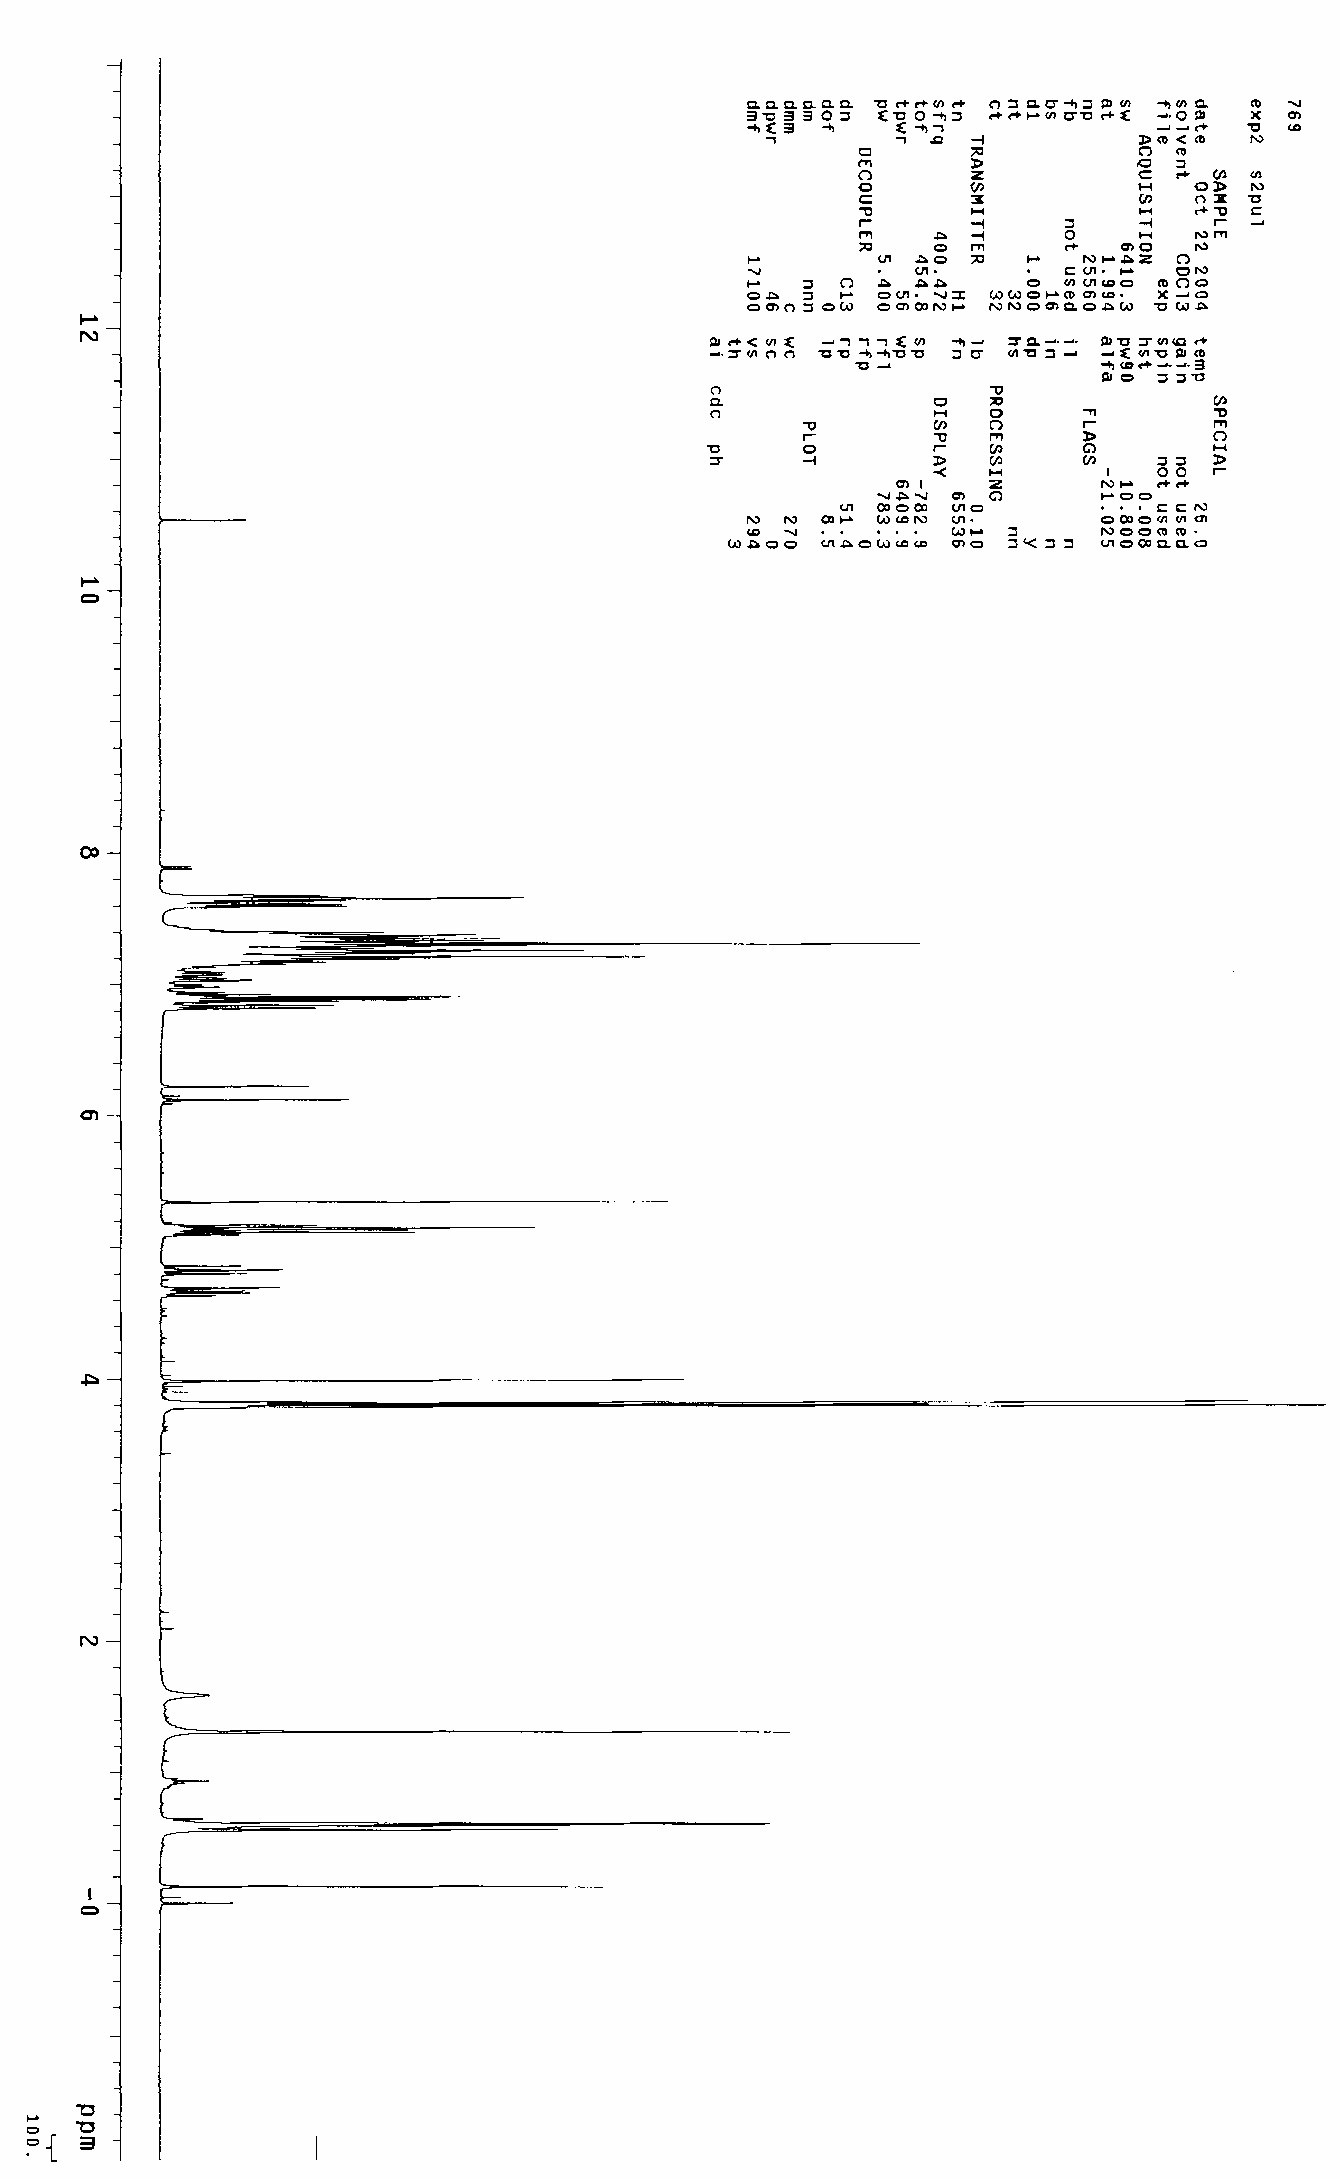


**14**


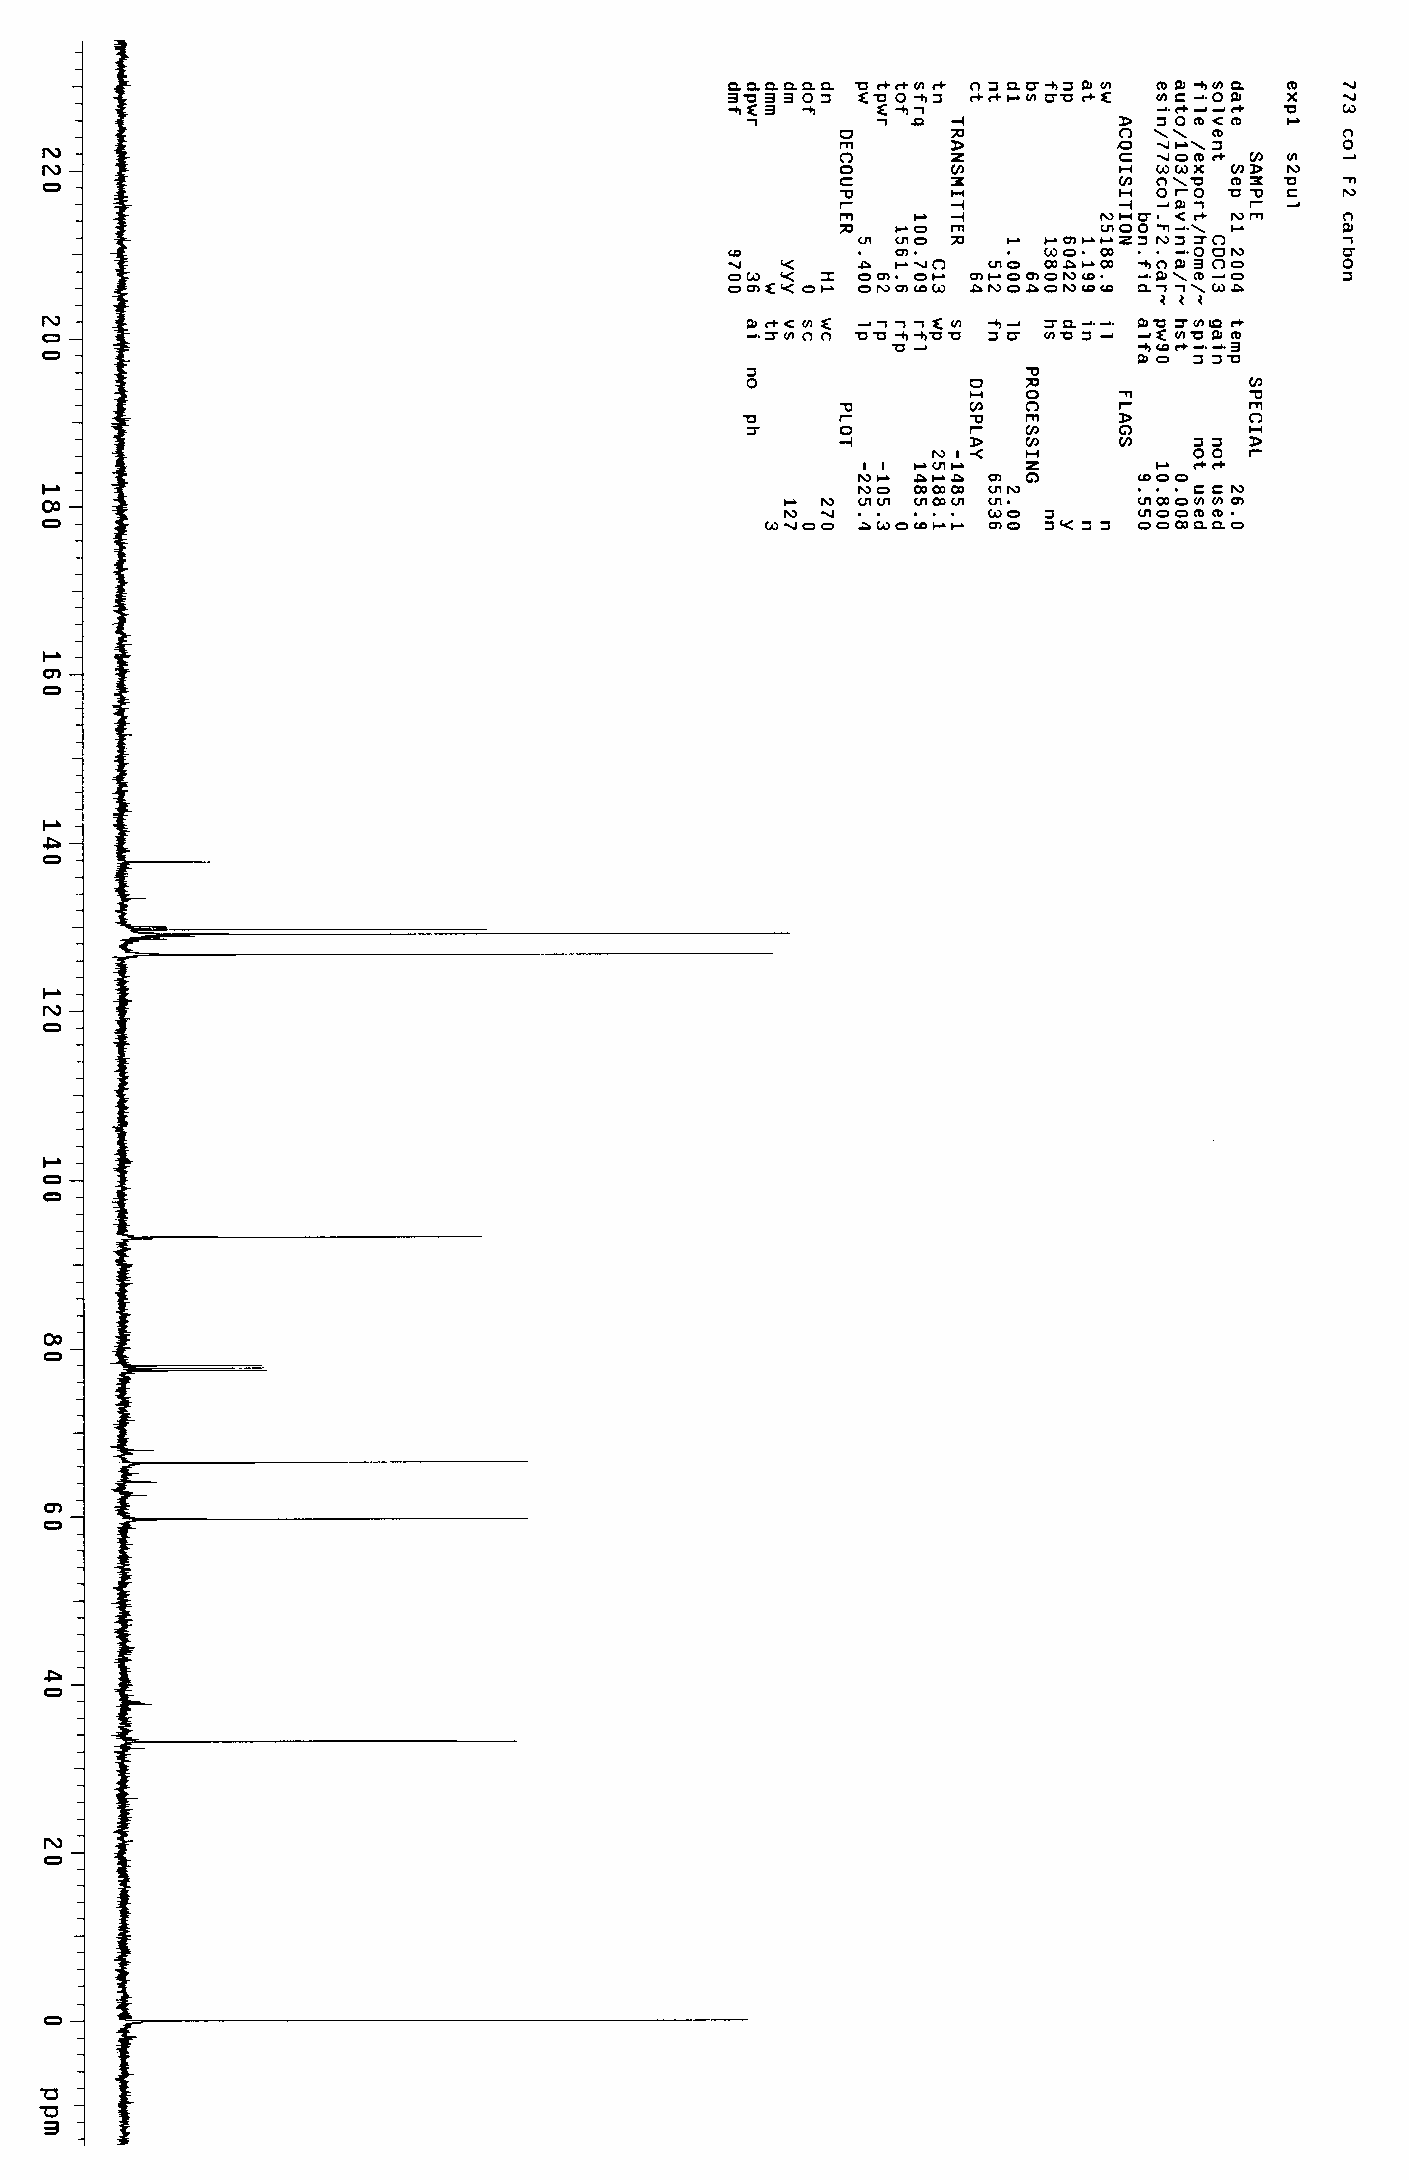


**16**


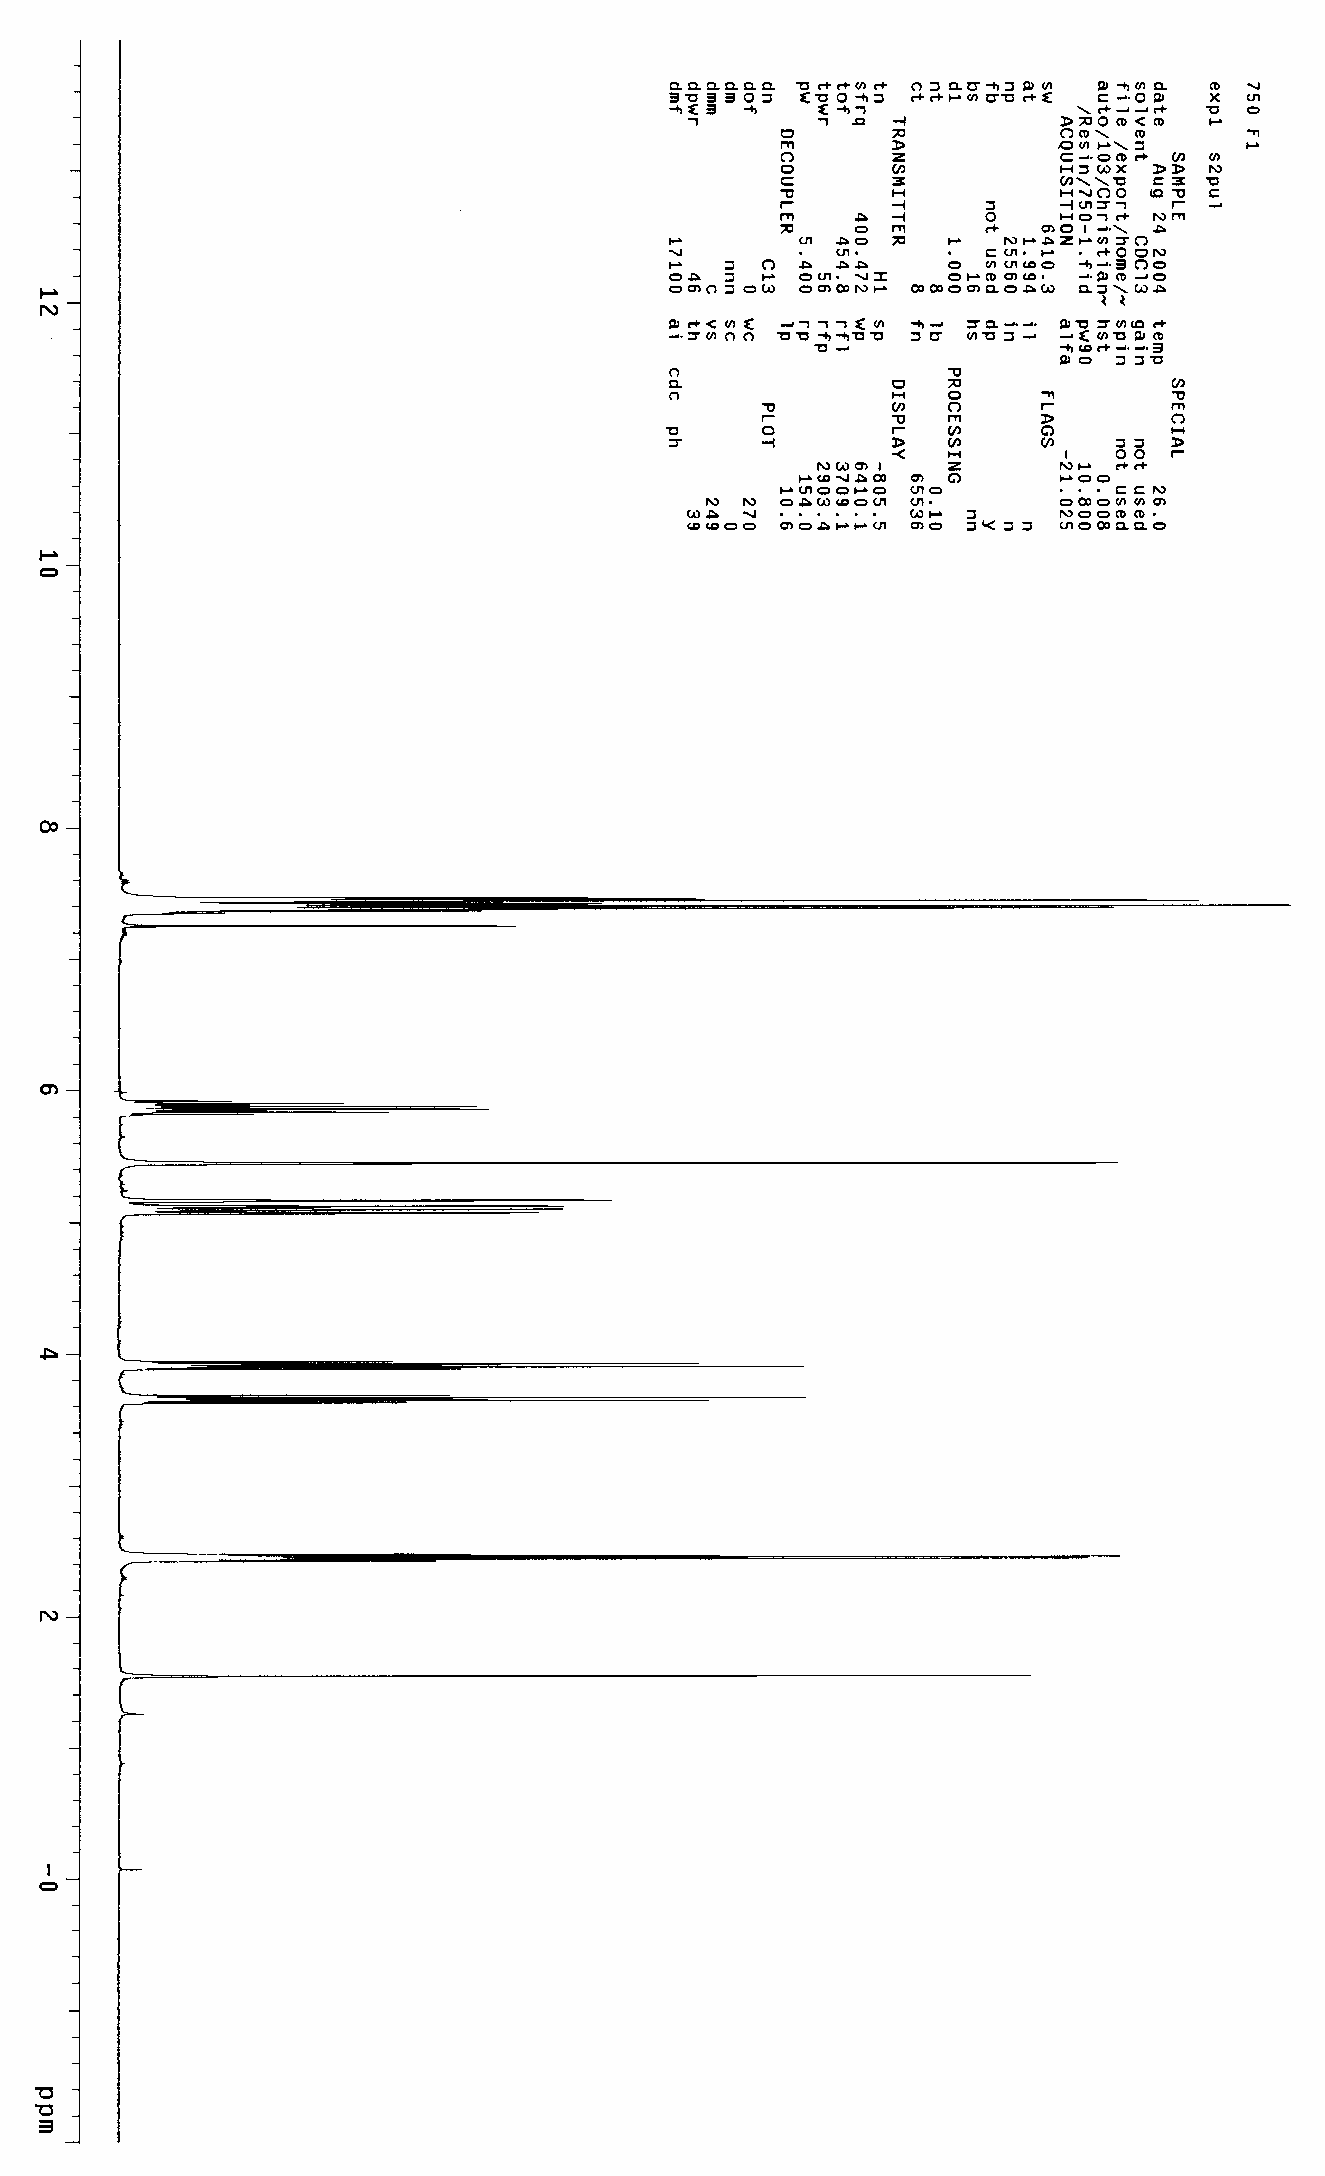


**25a**


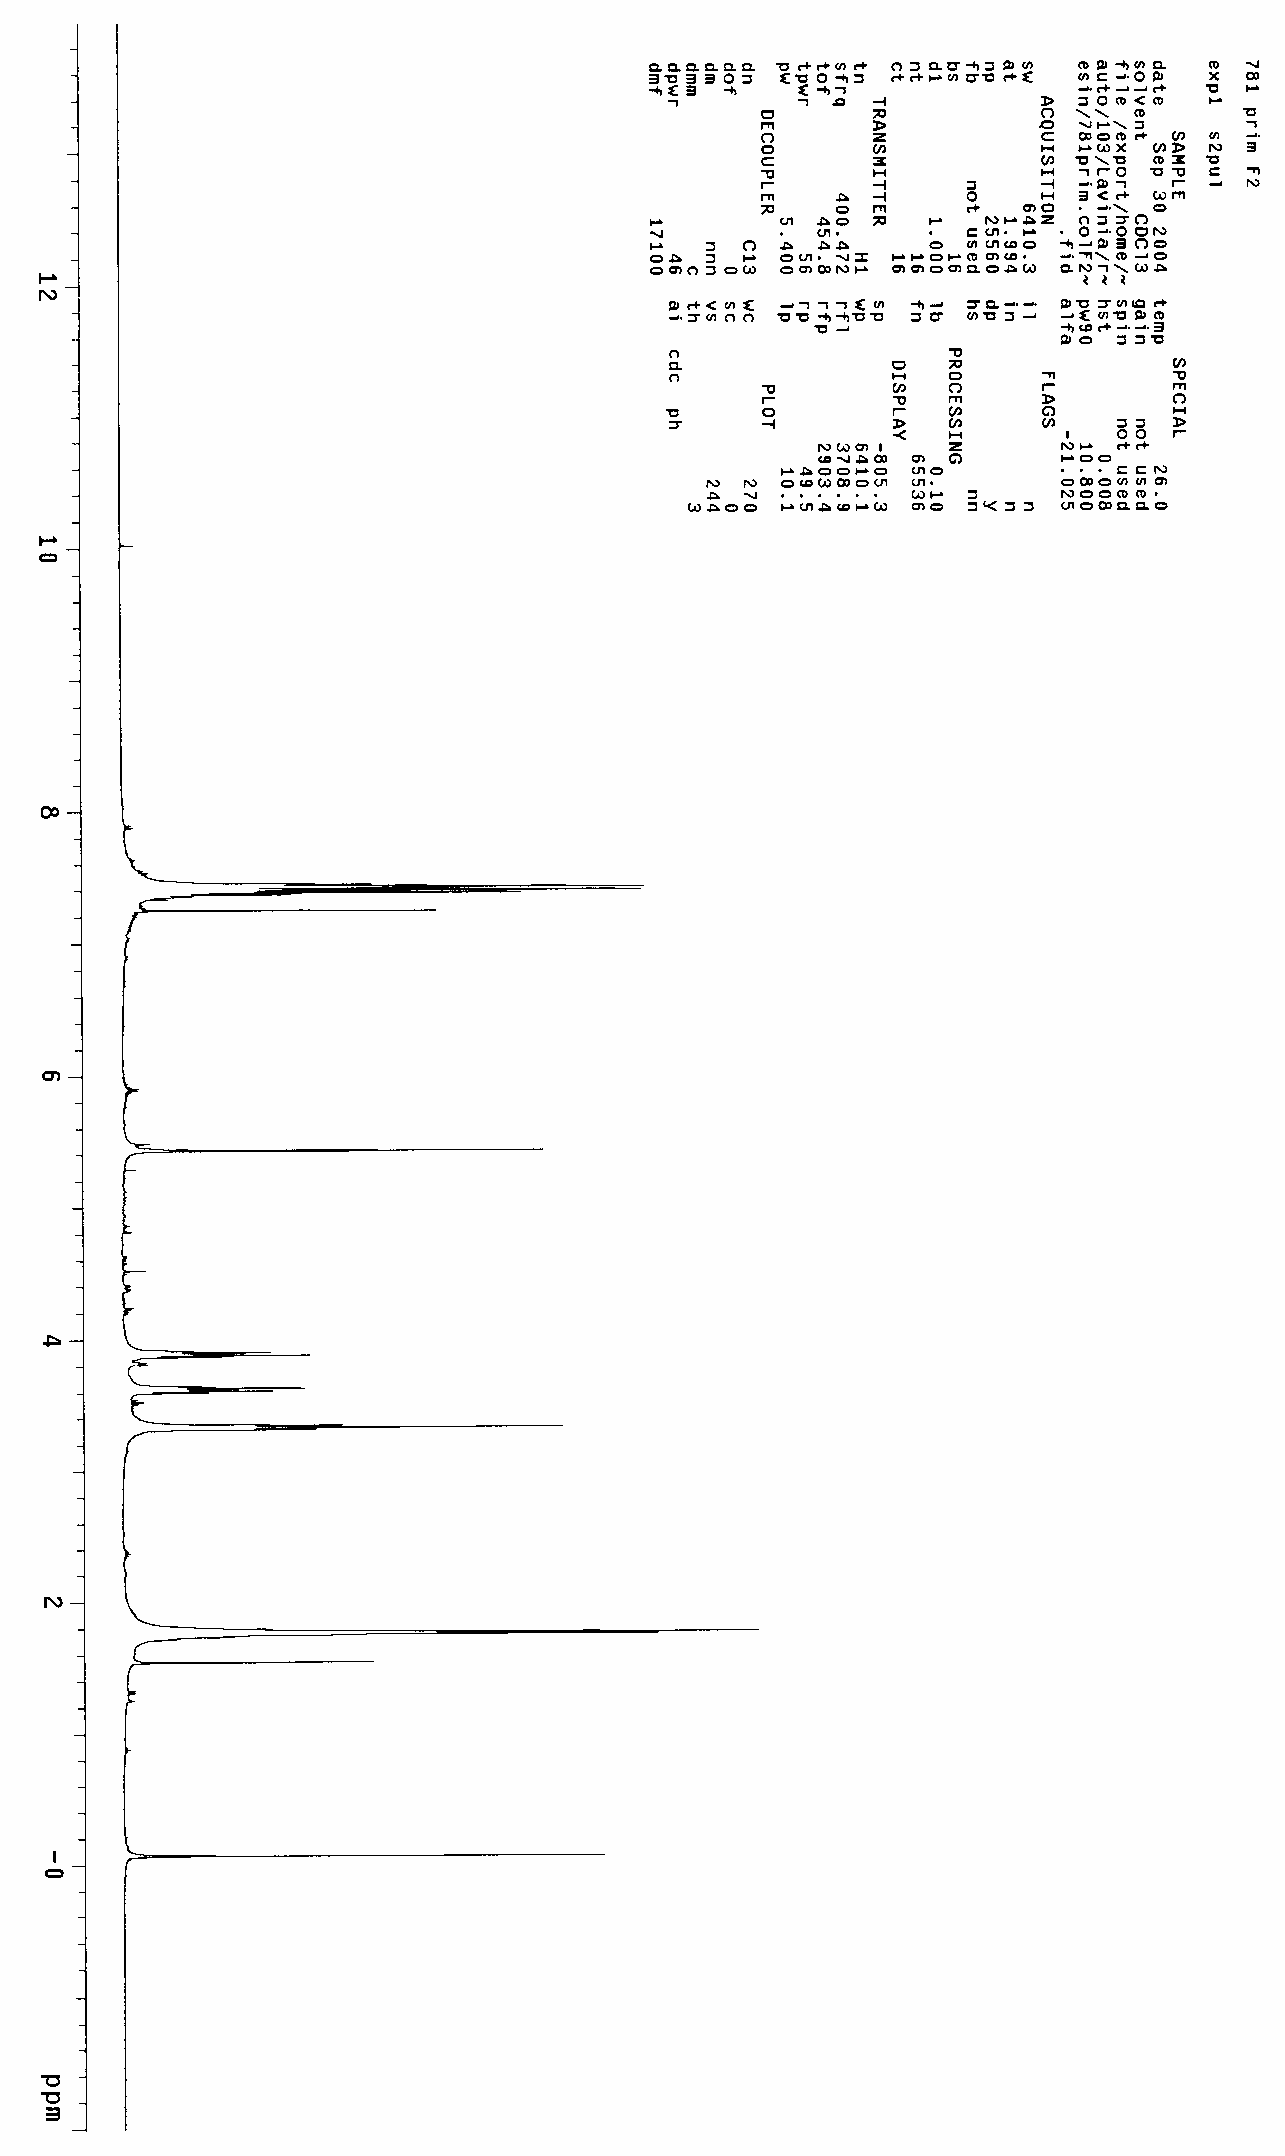


**26a**


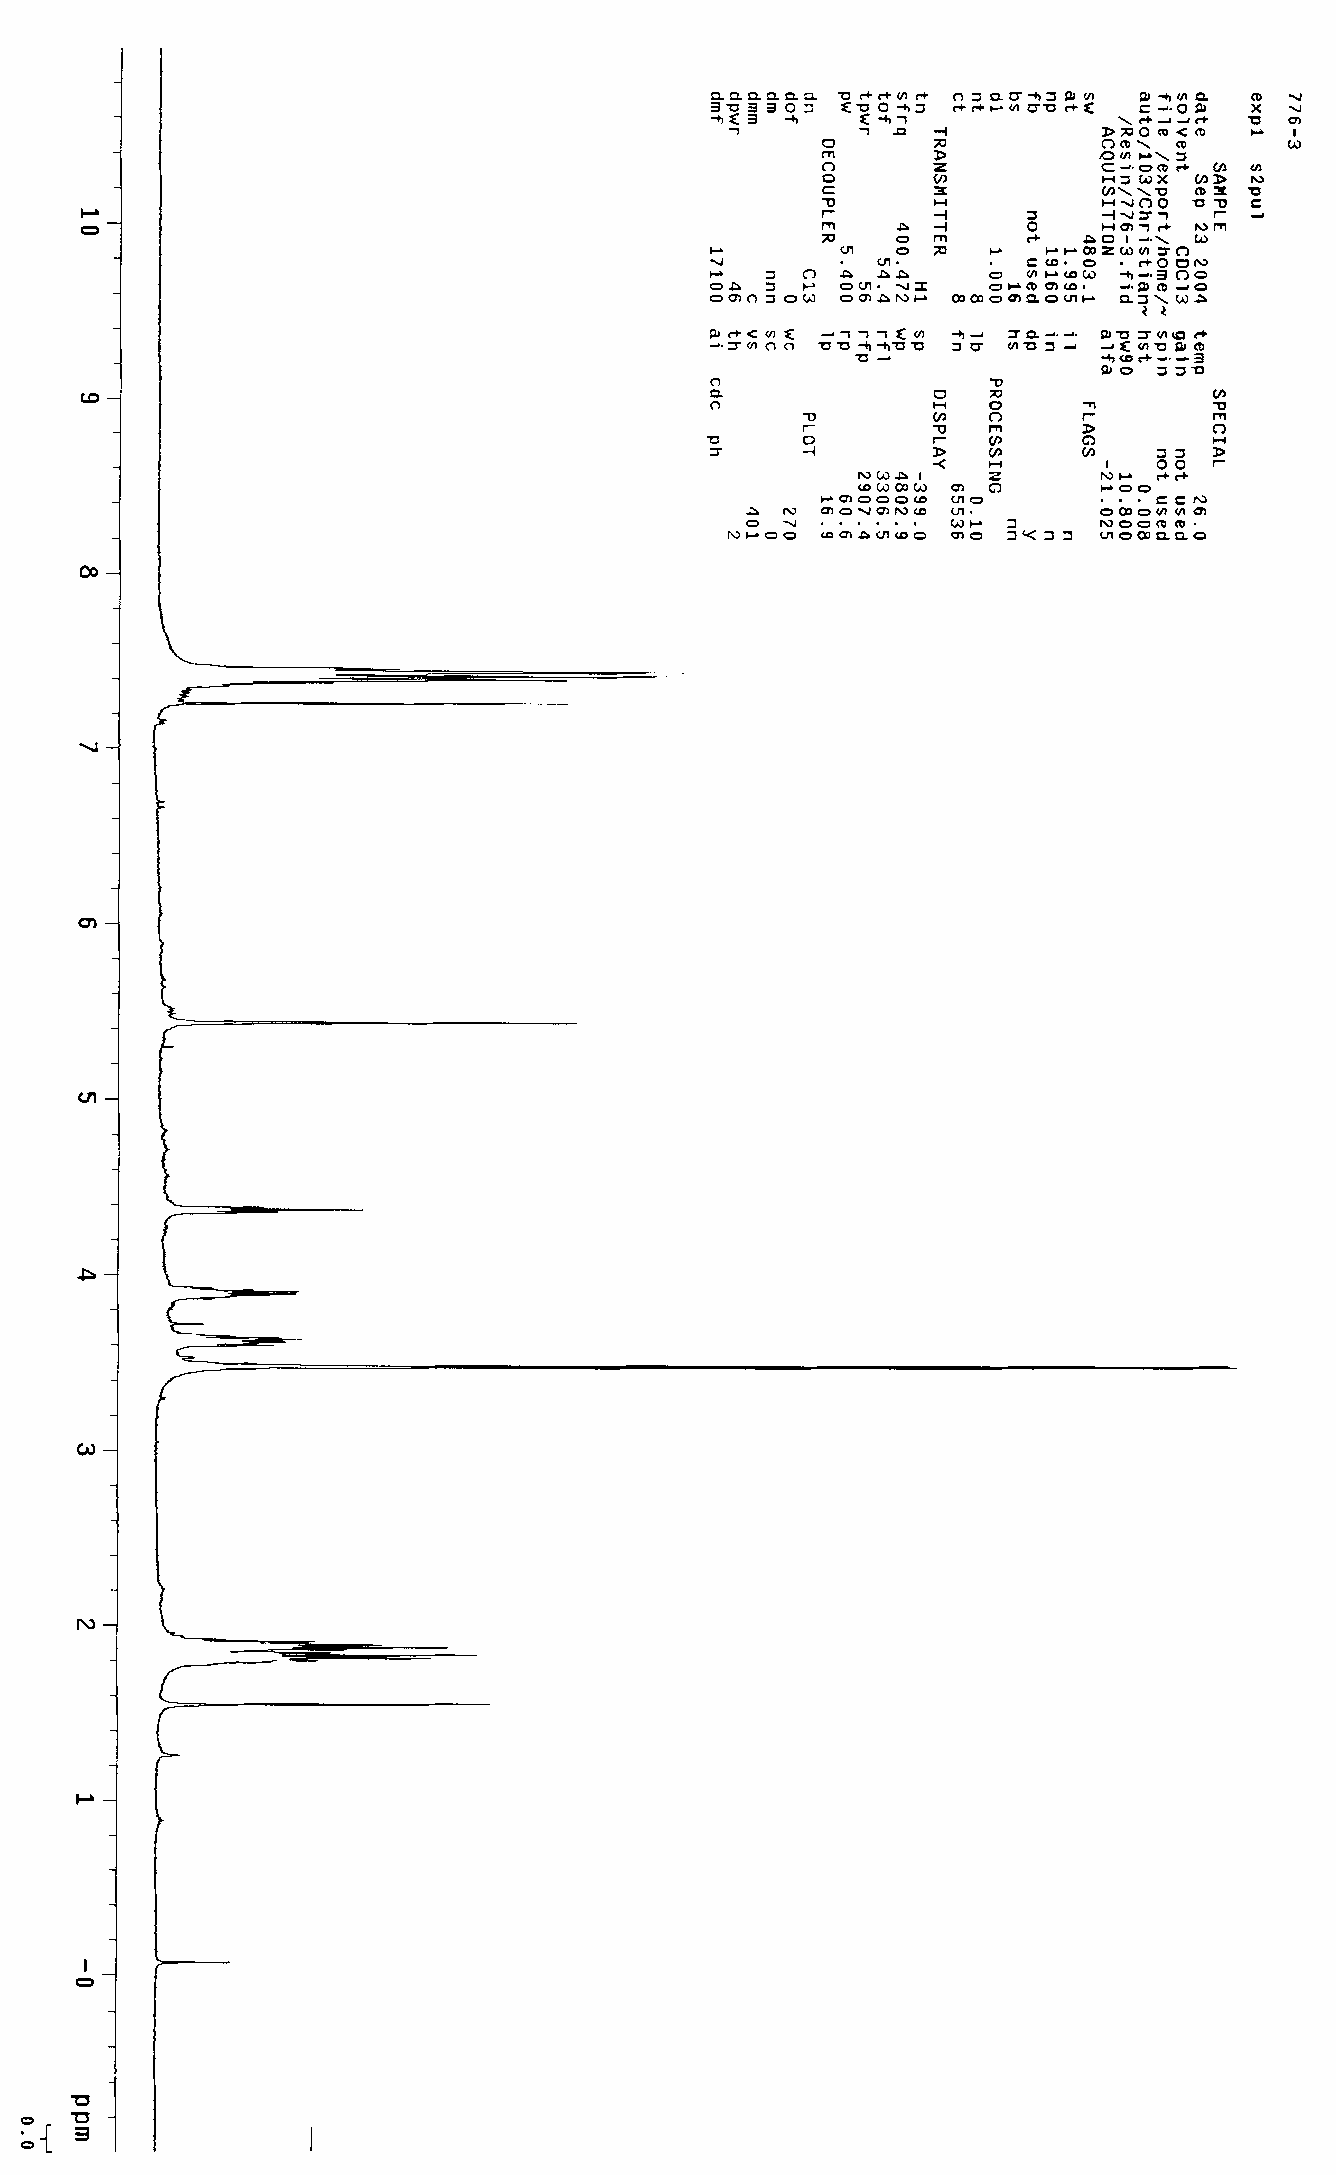


**26b**


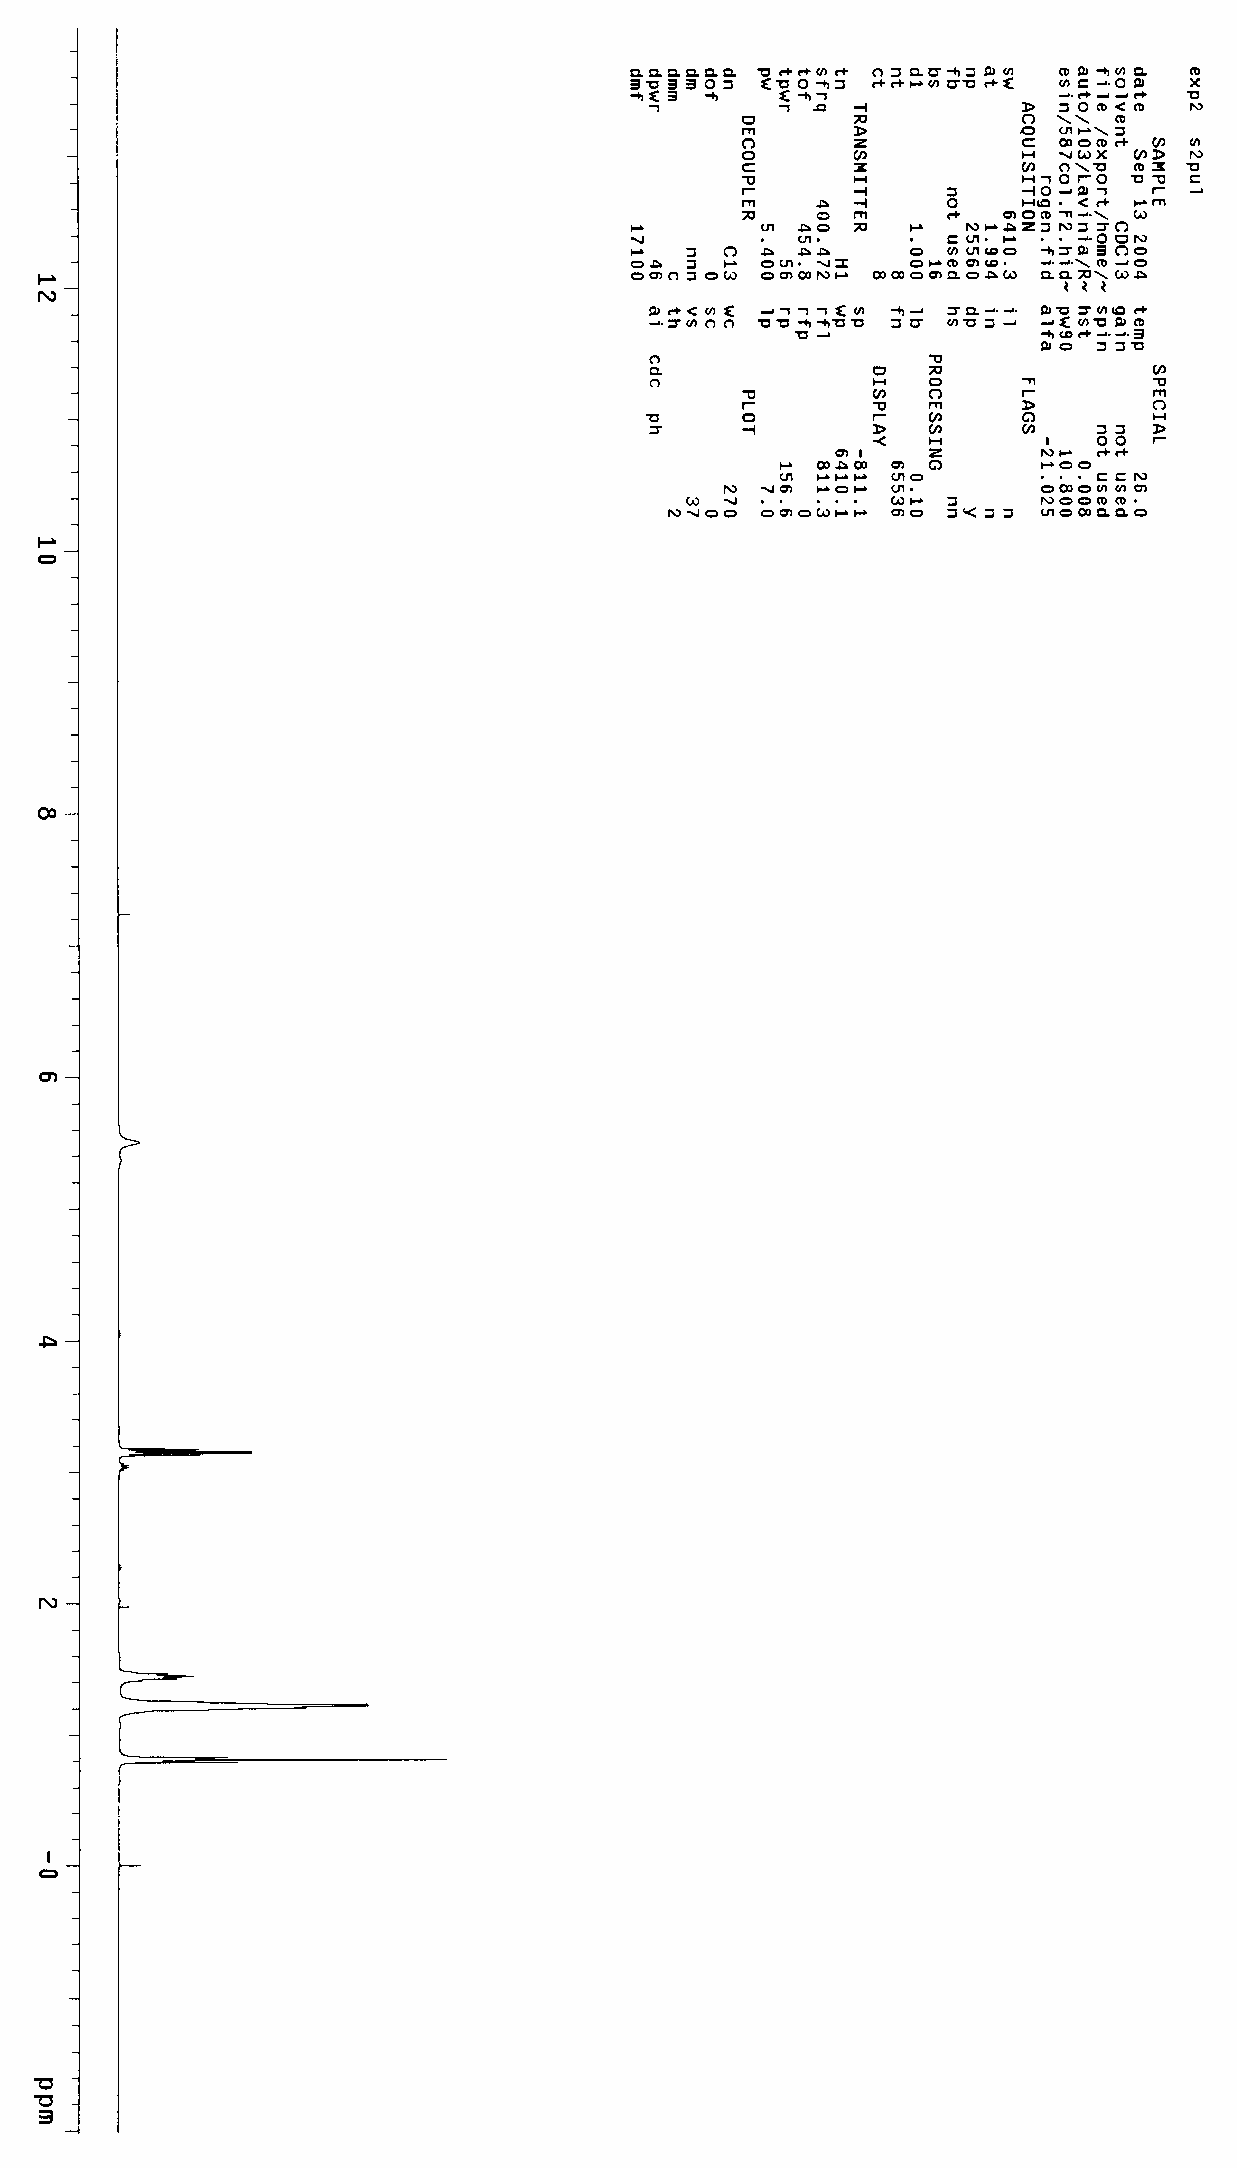


**30**


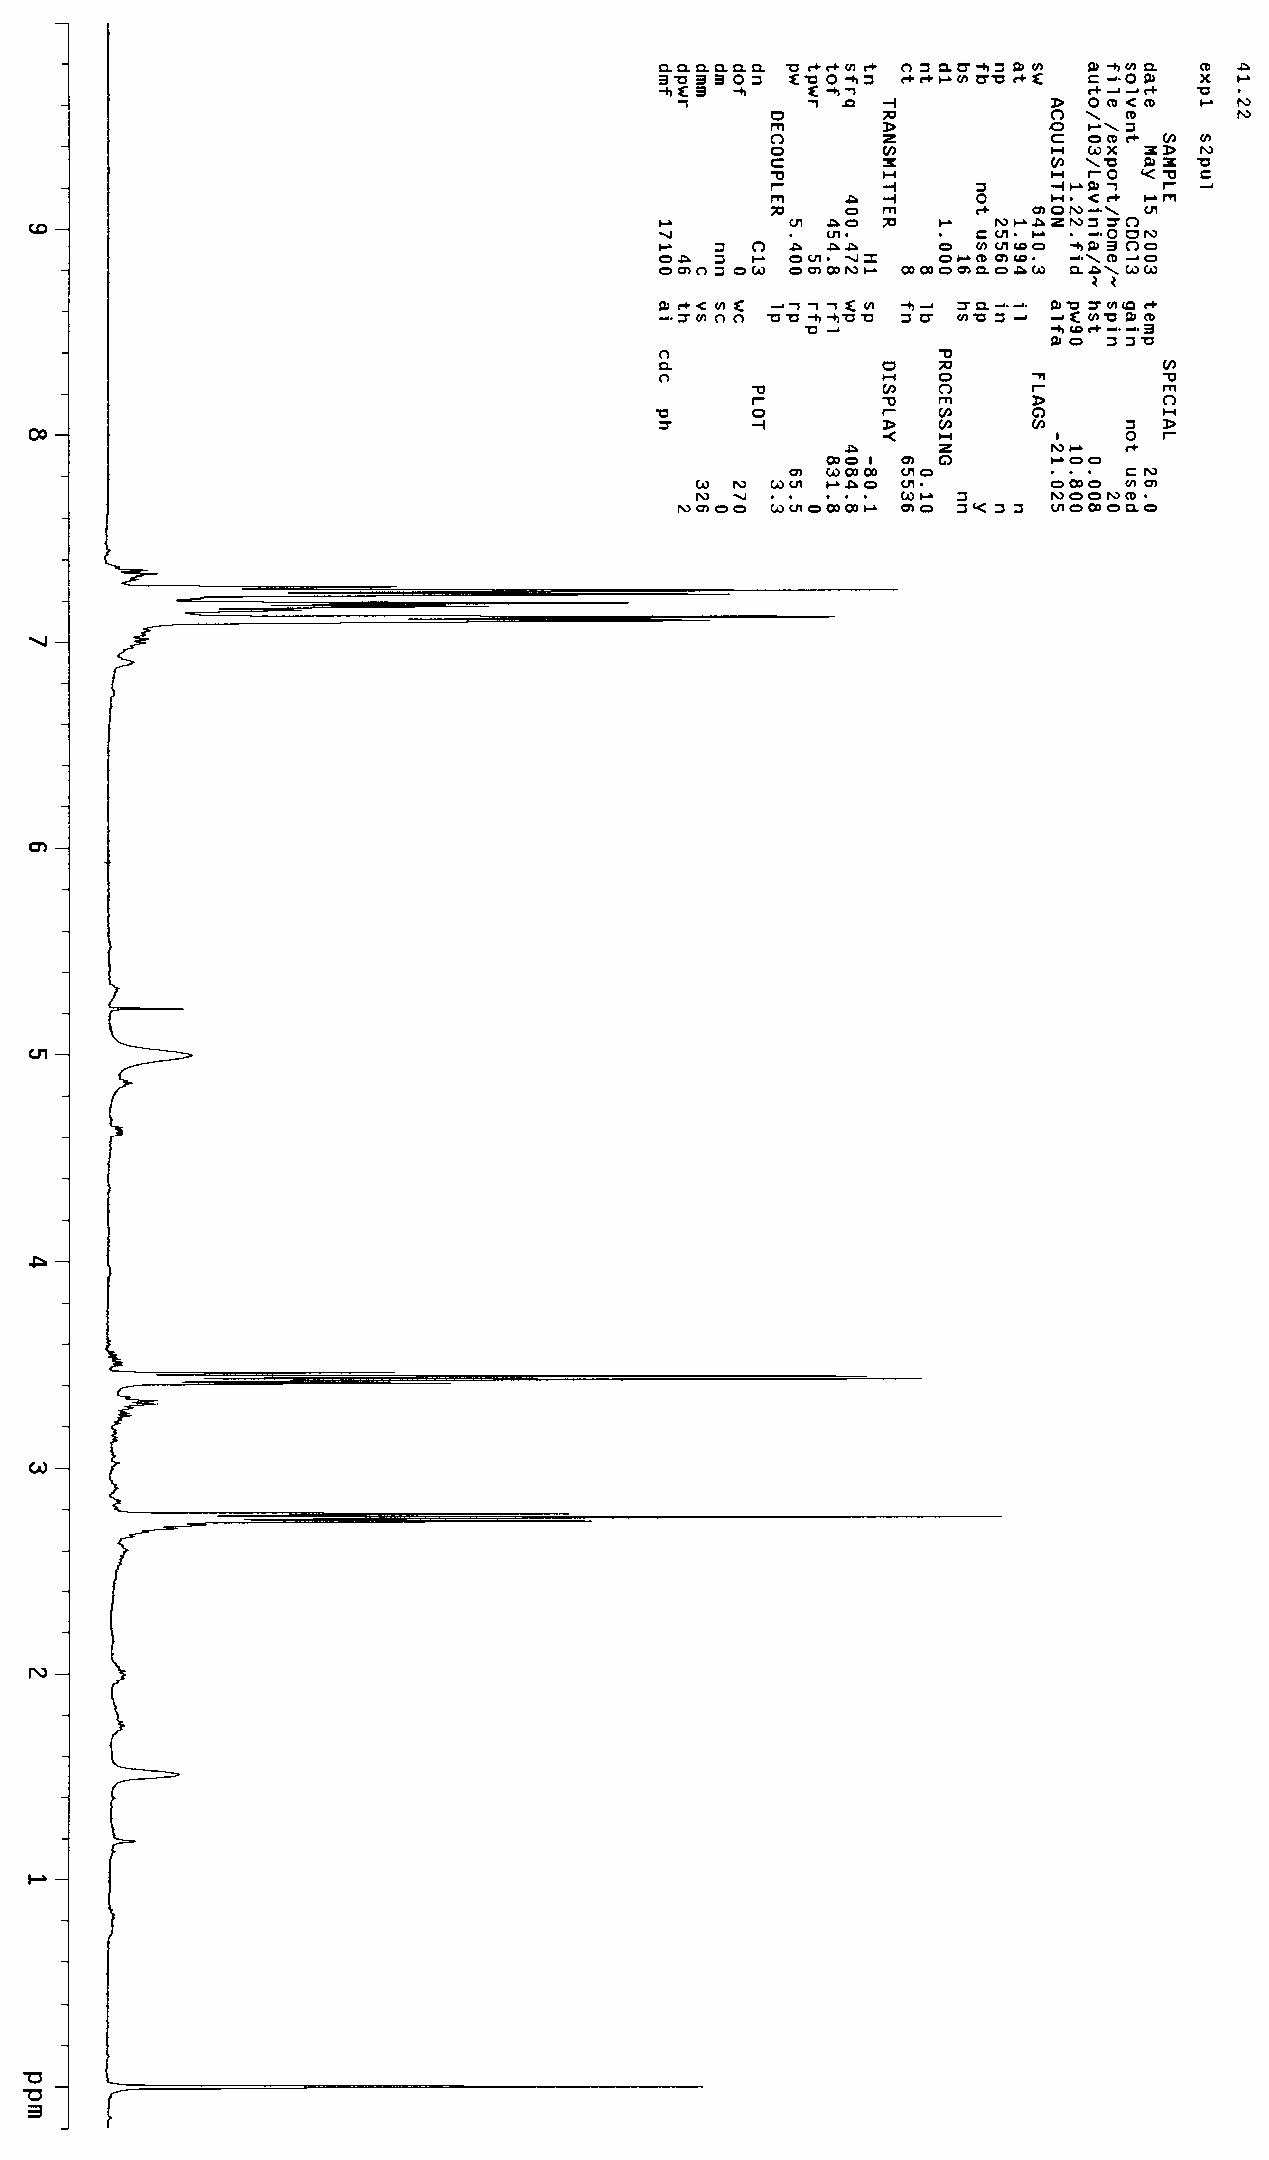


**32**


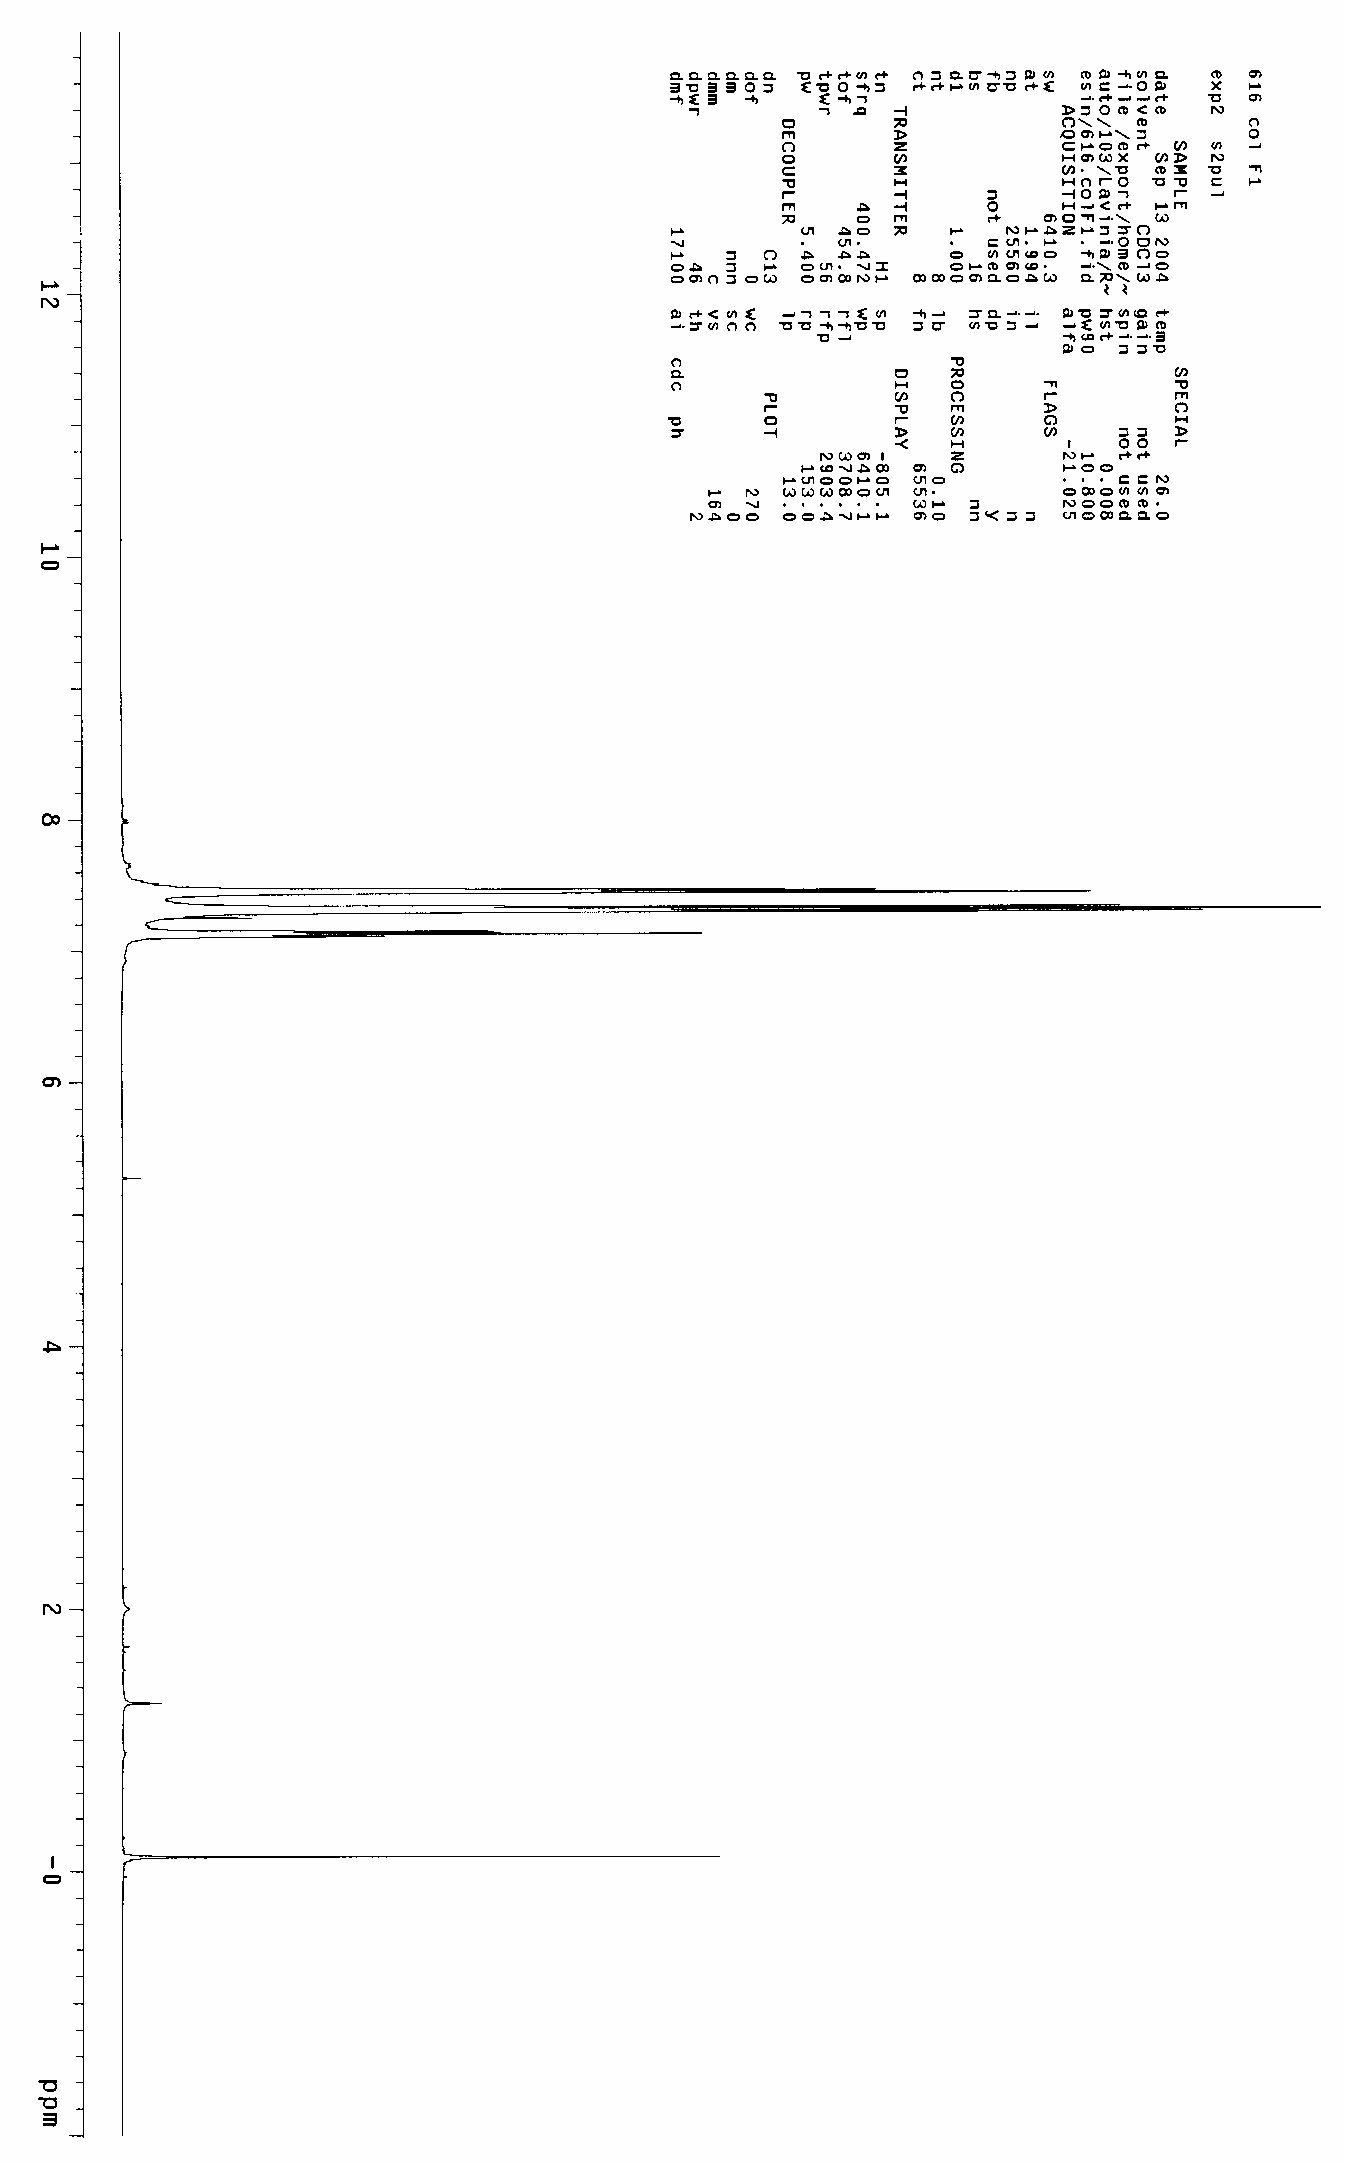


**34**


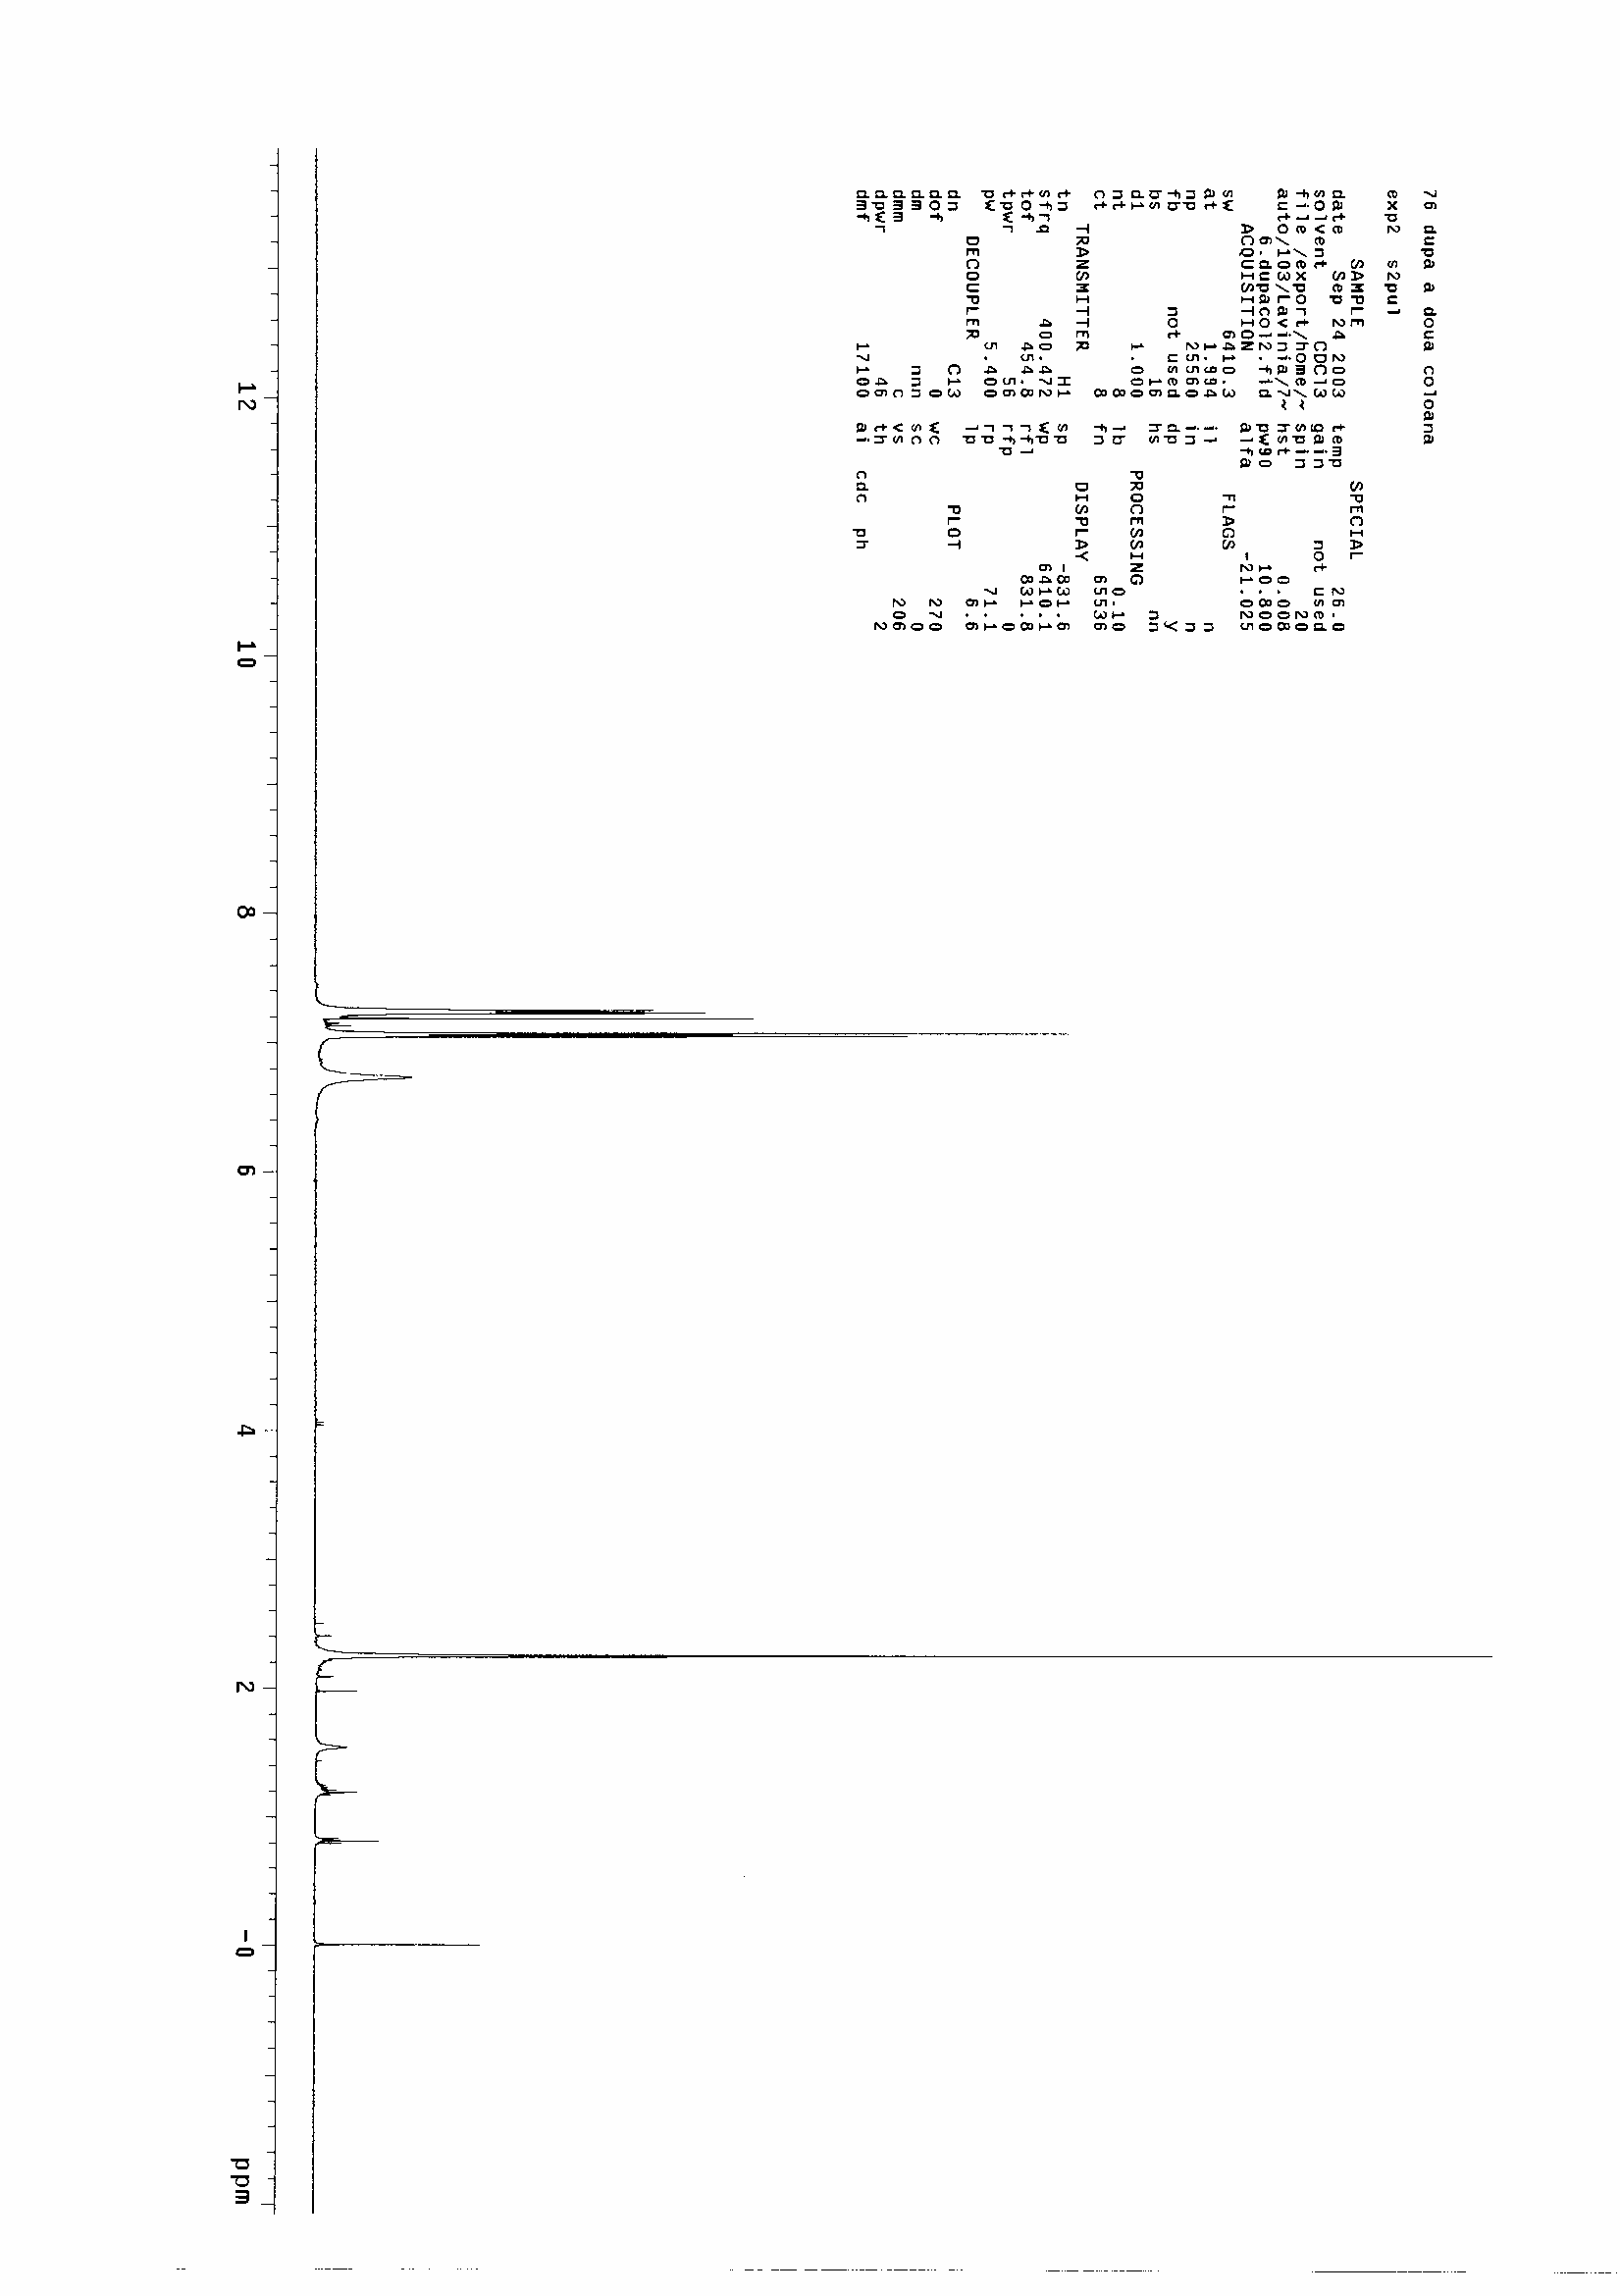


**36**


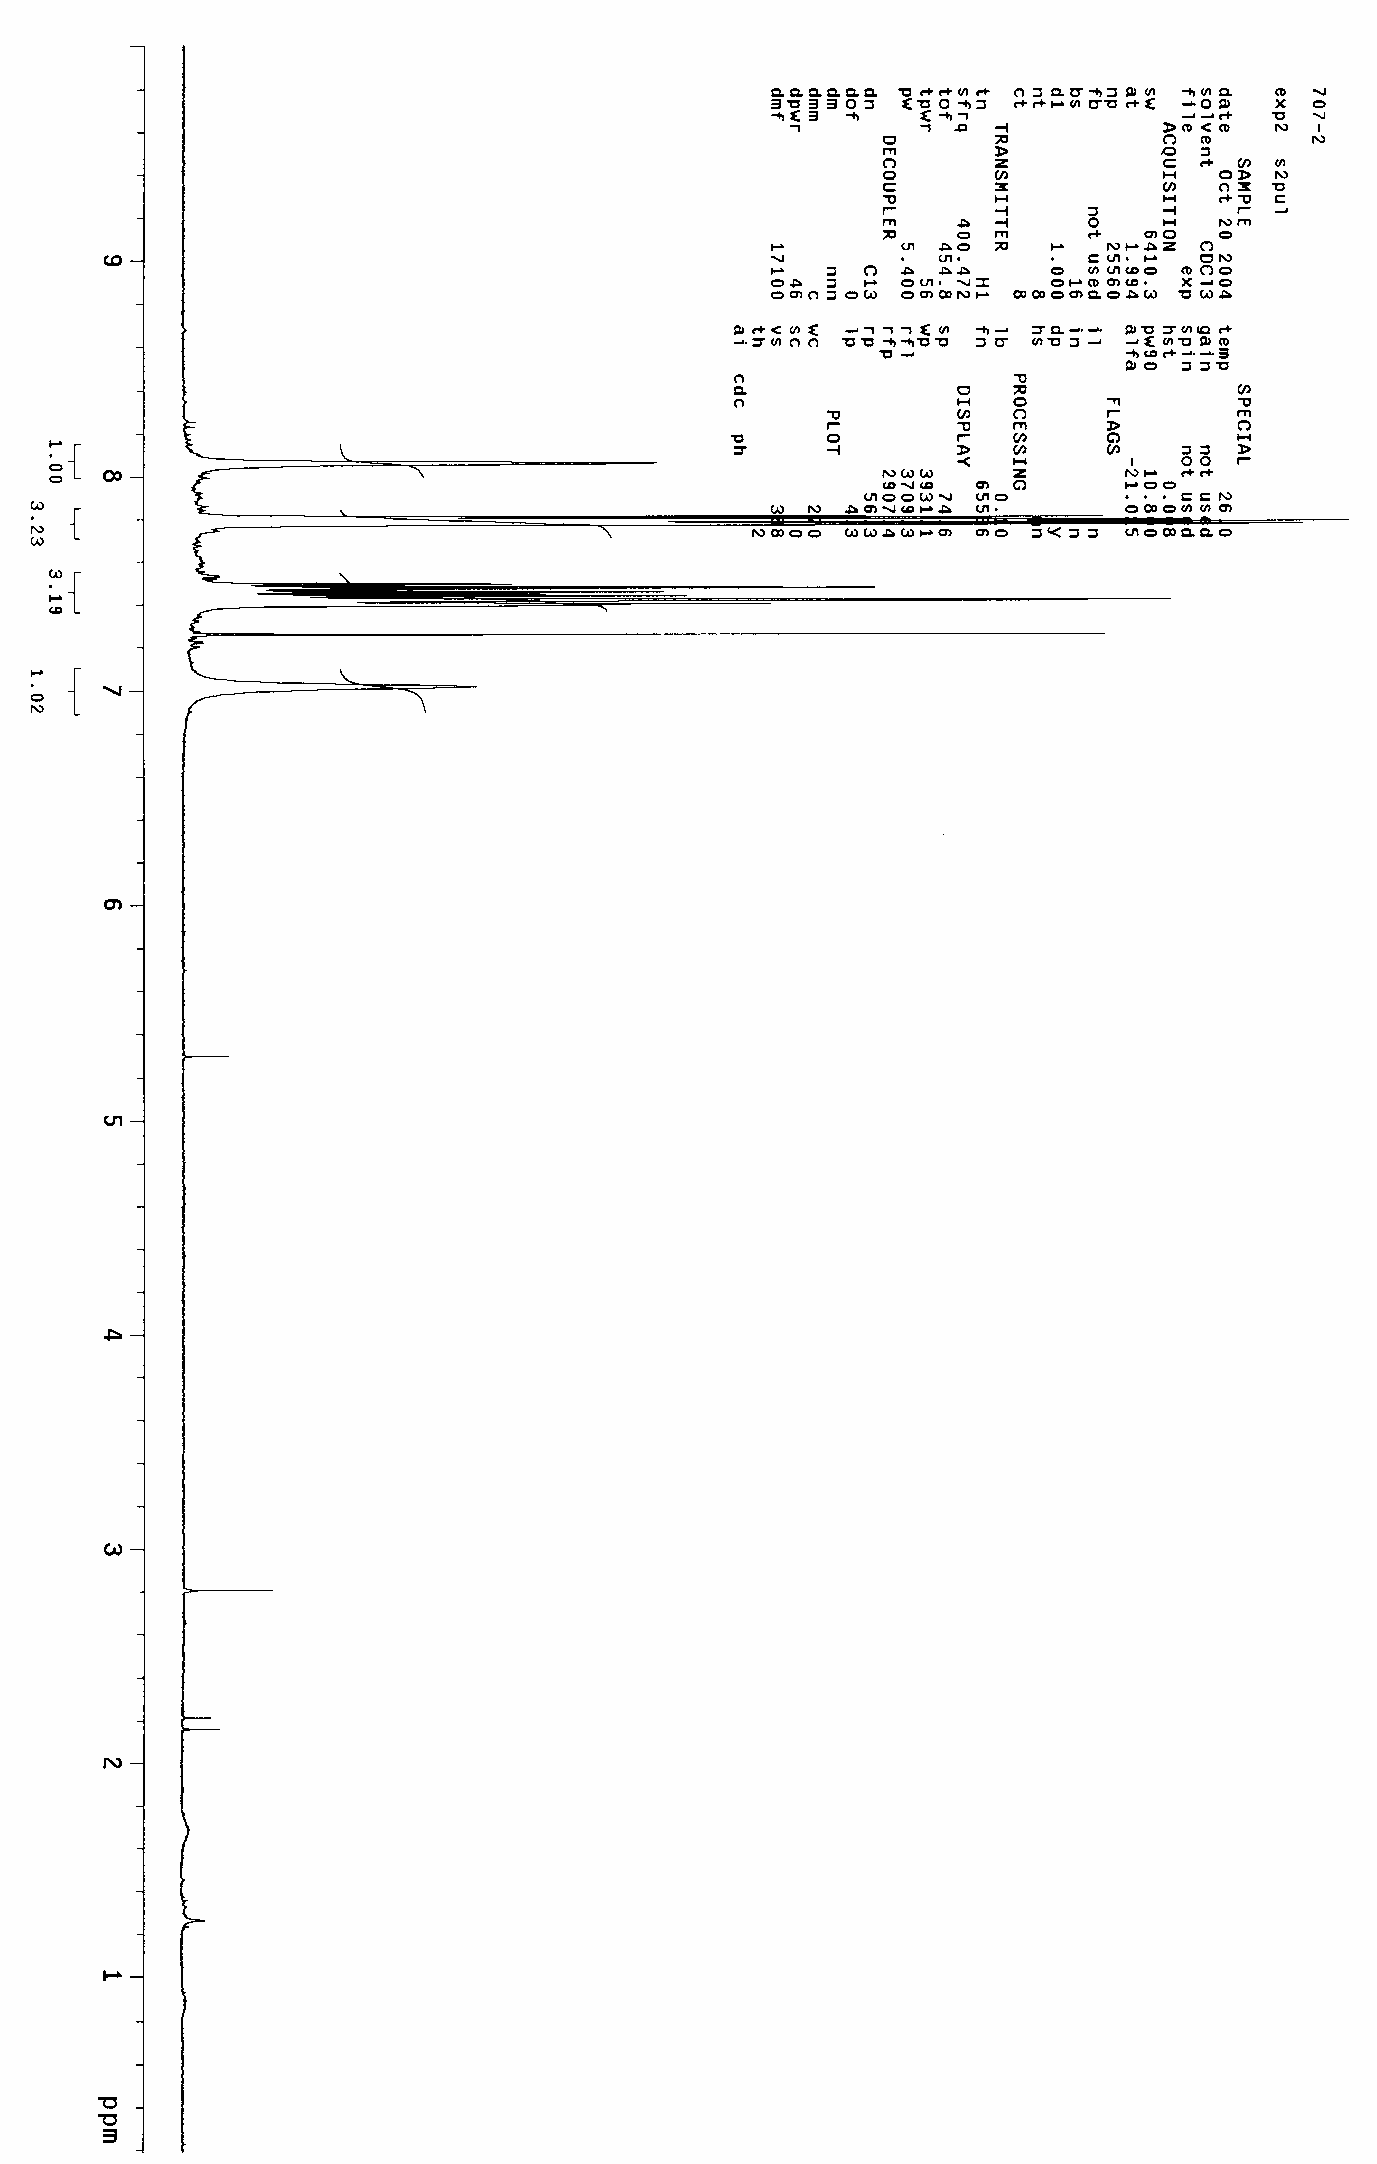


**38**


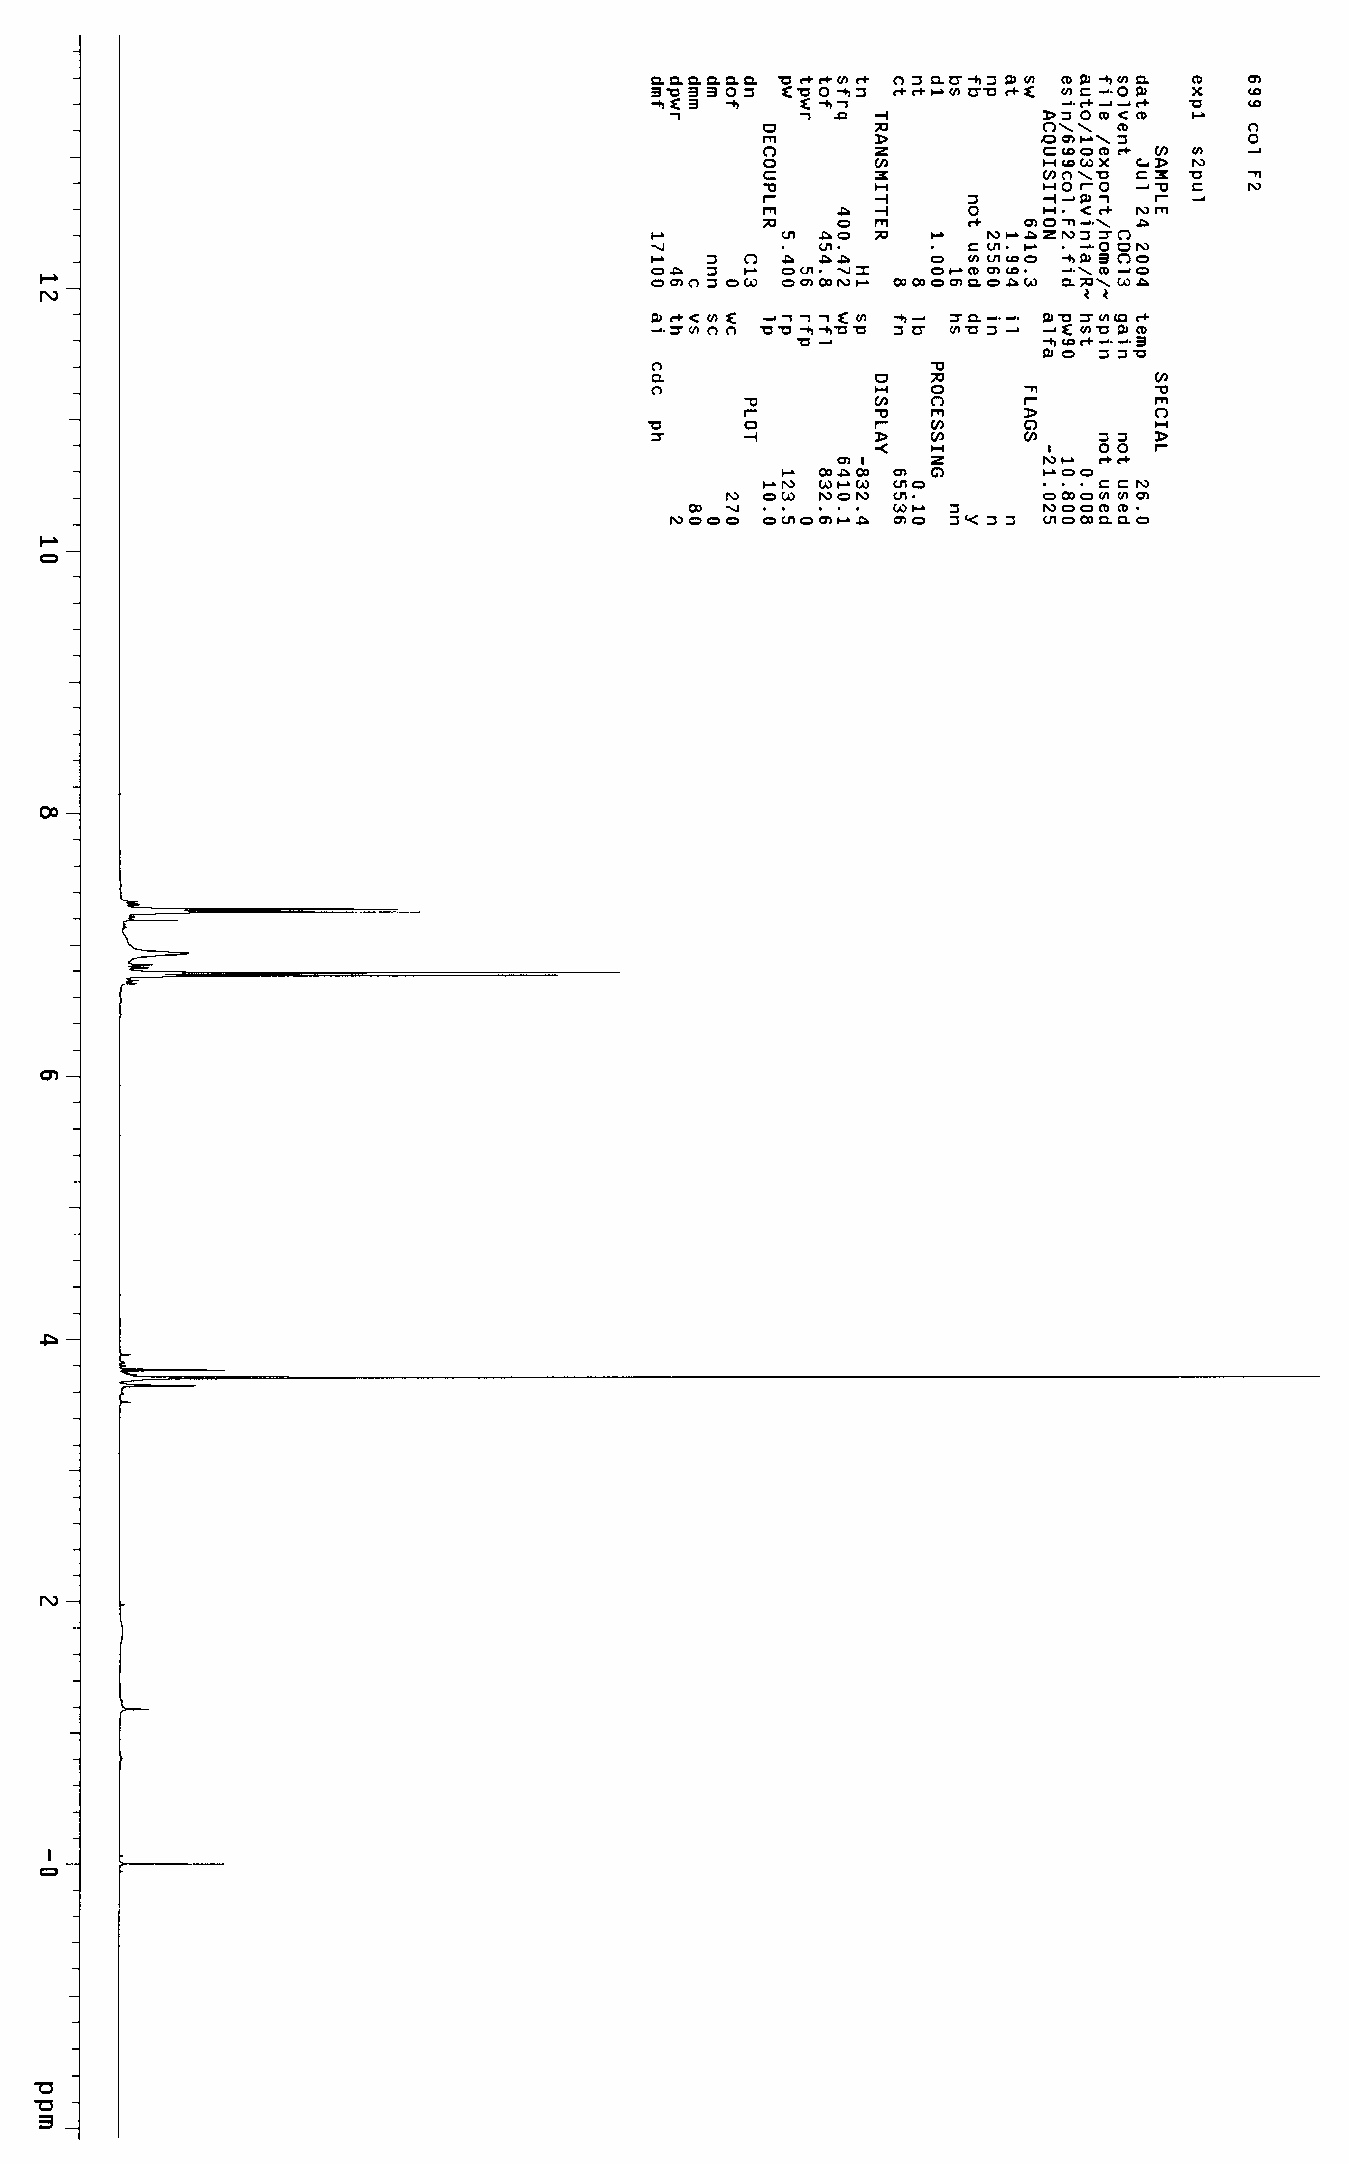


**40**


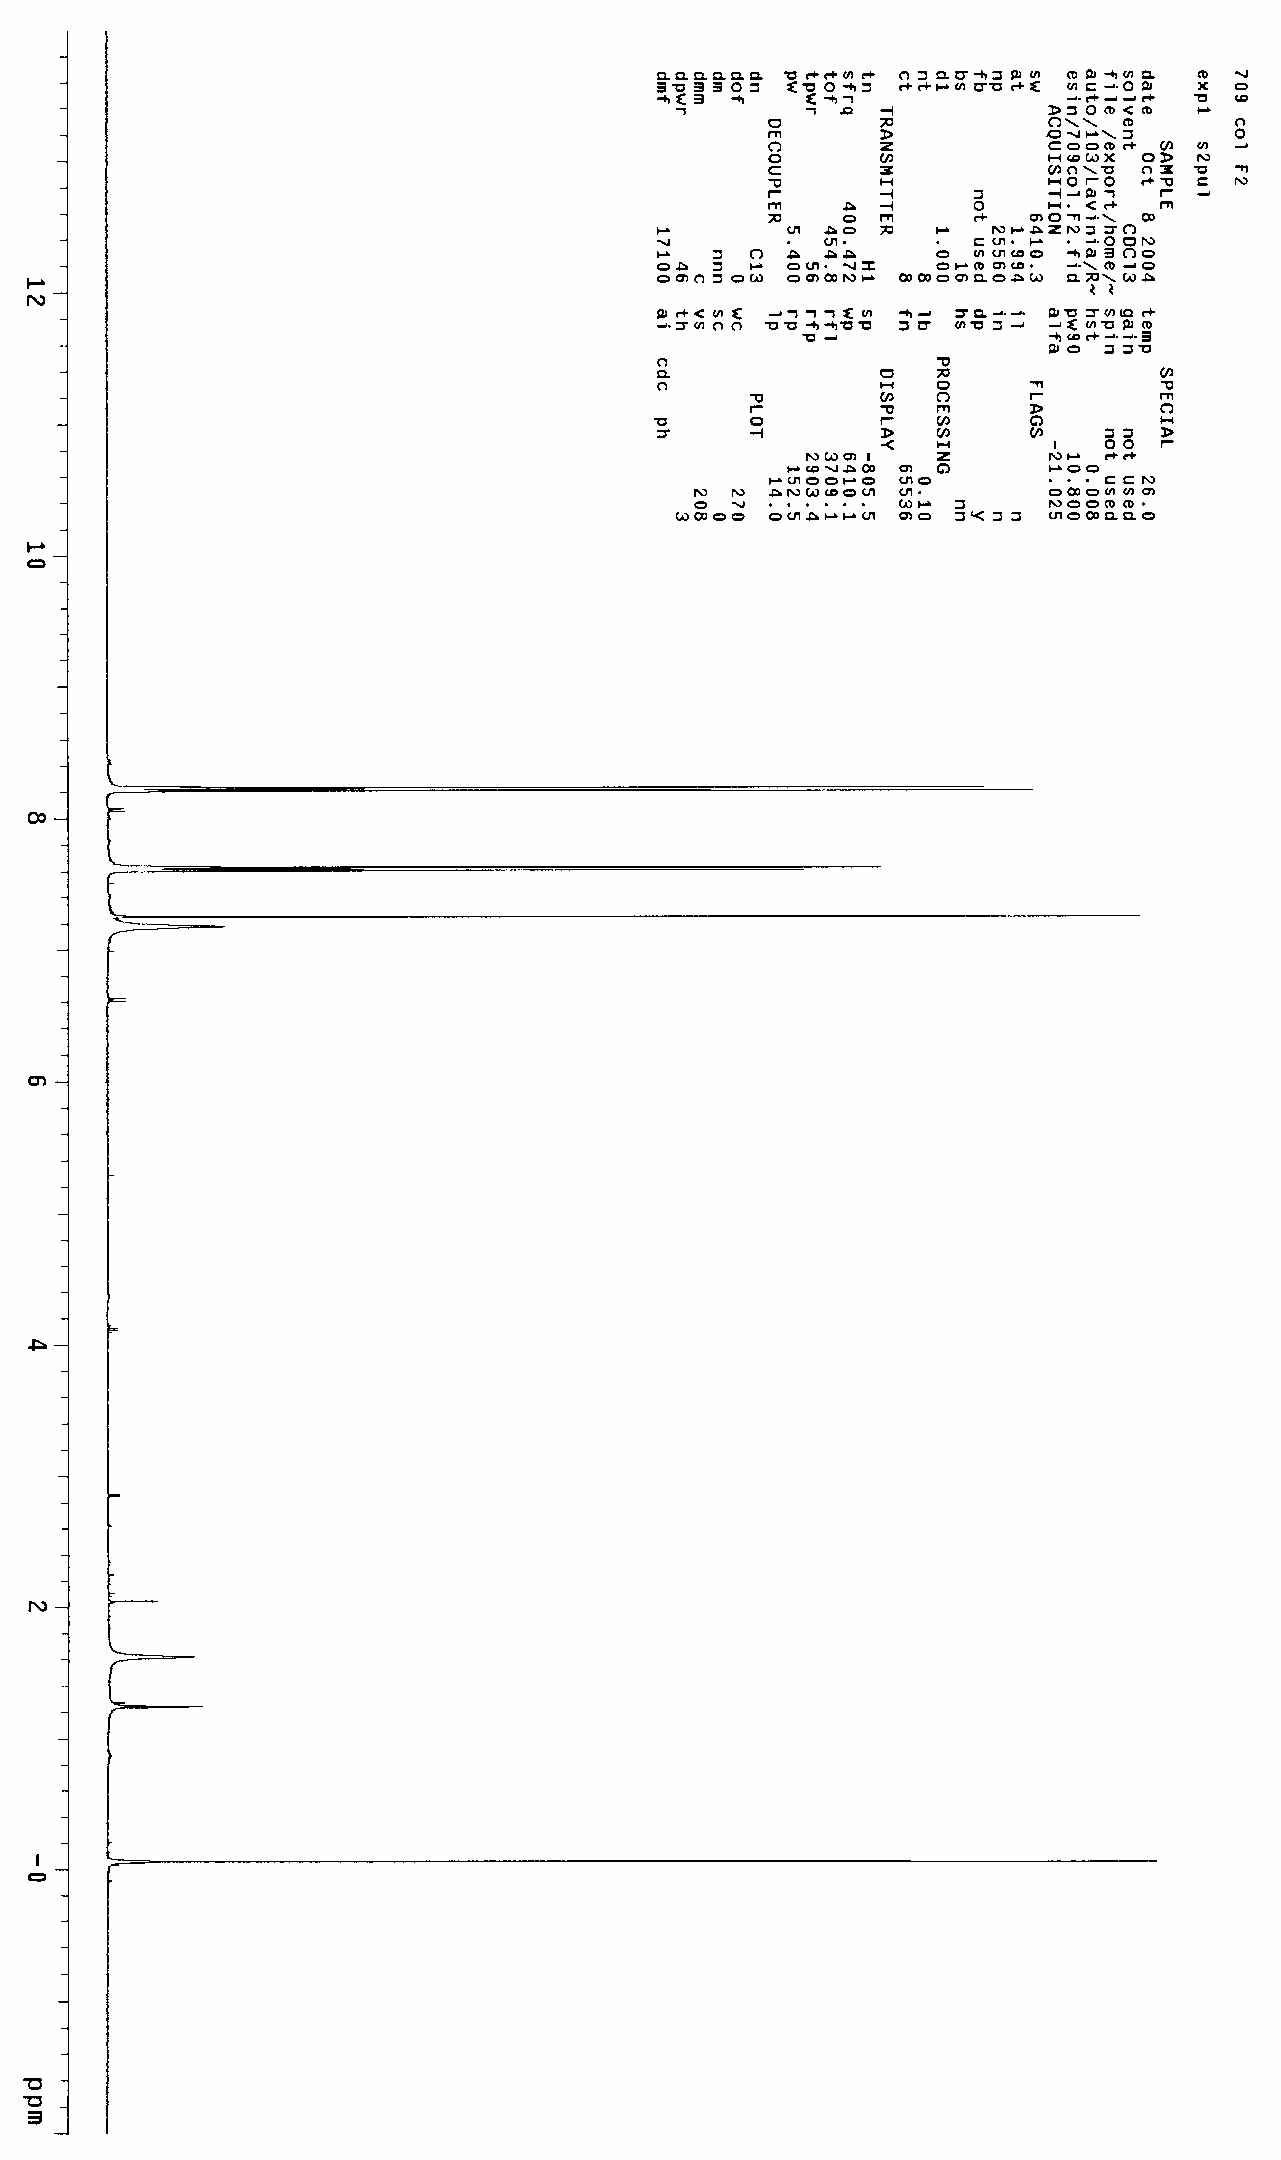


**42**


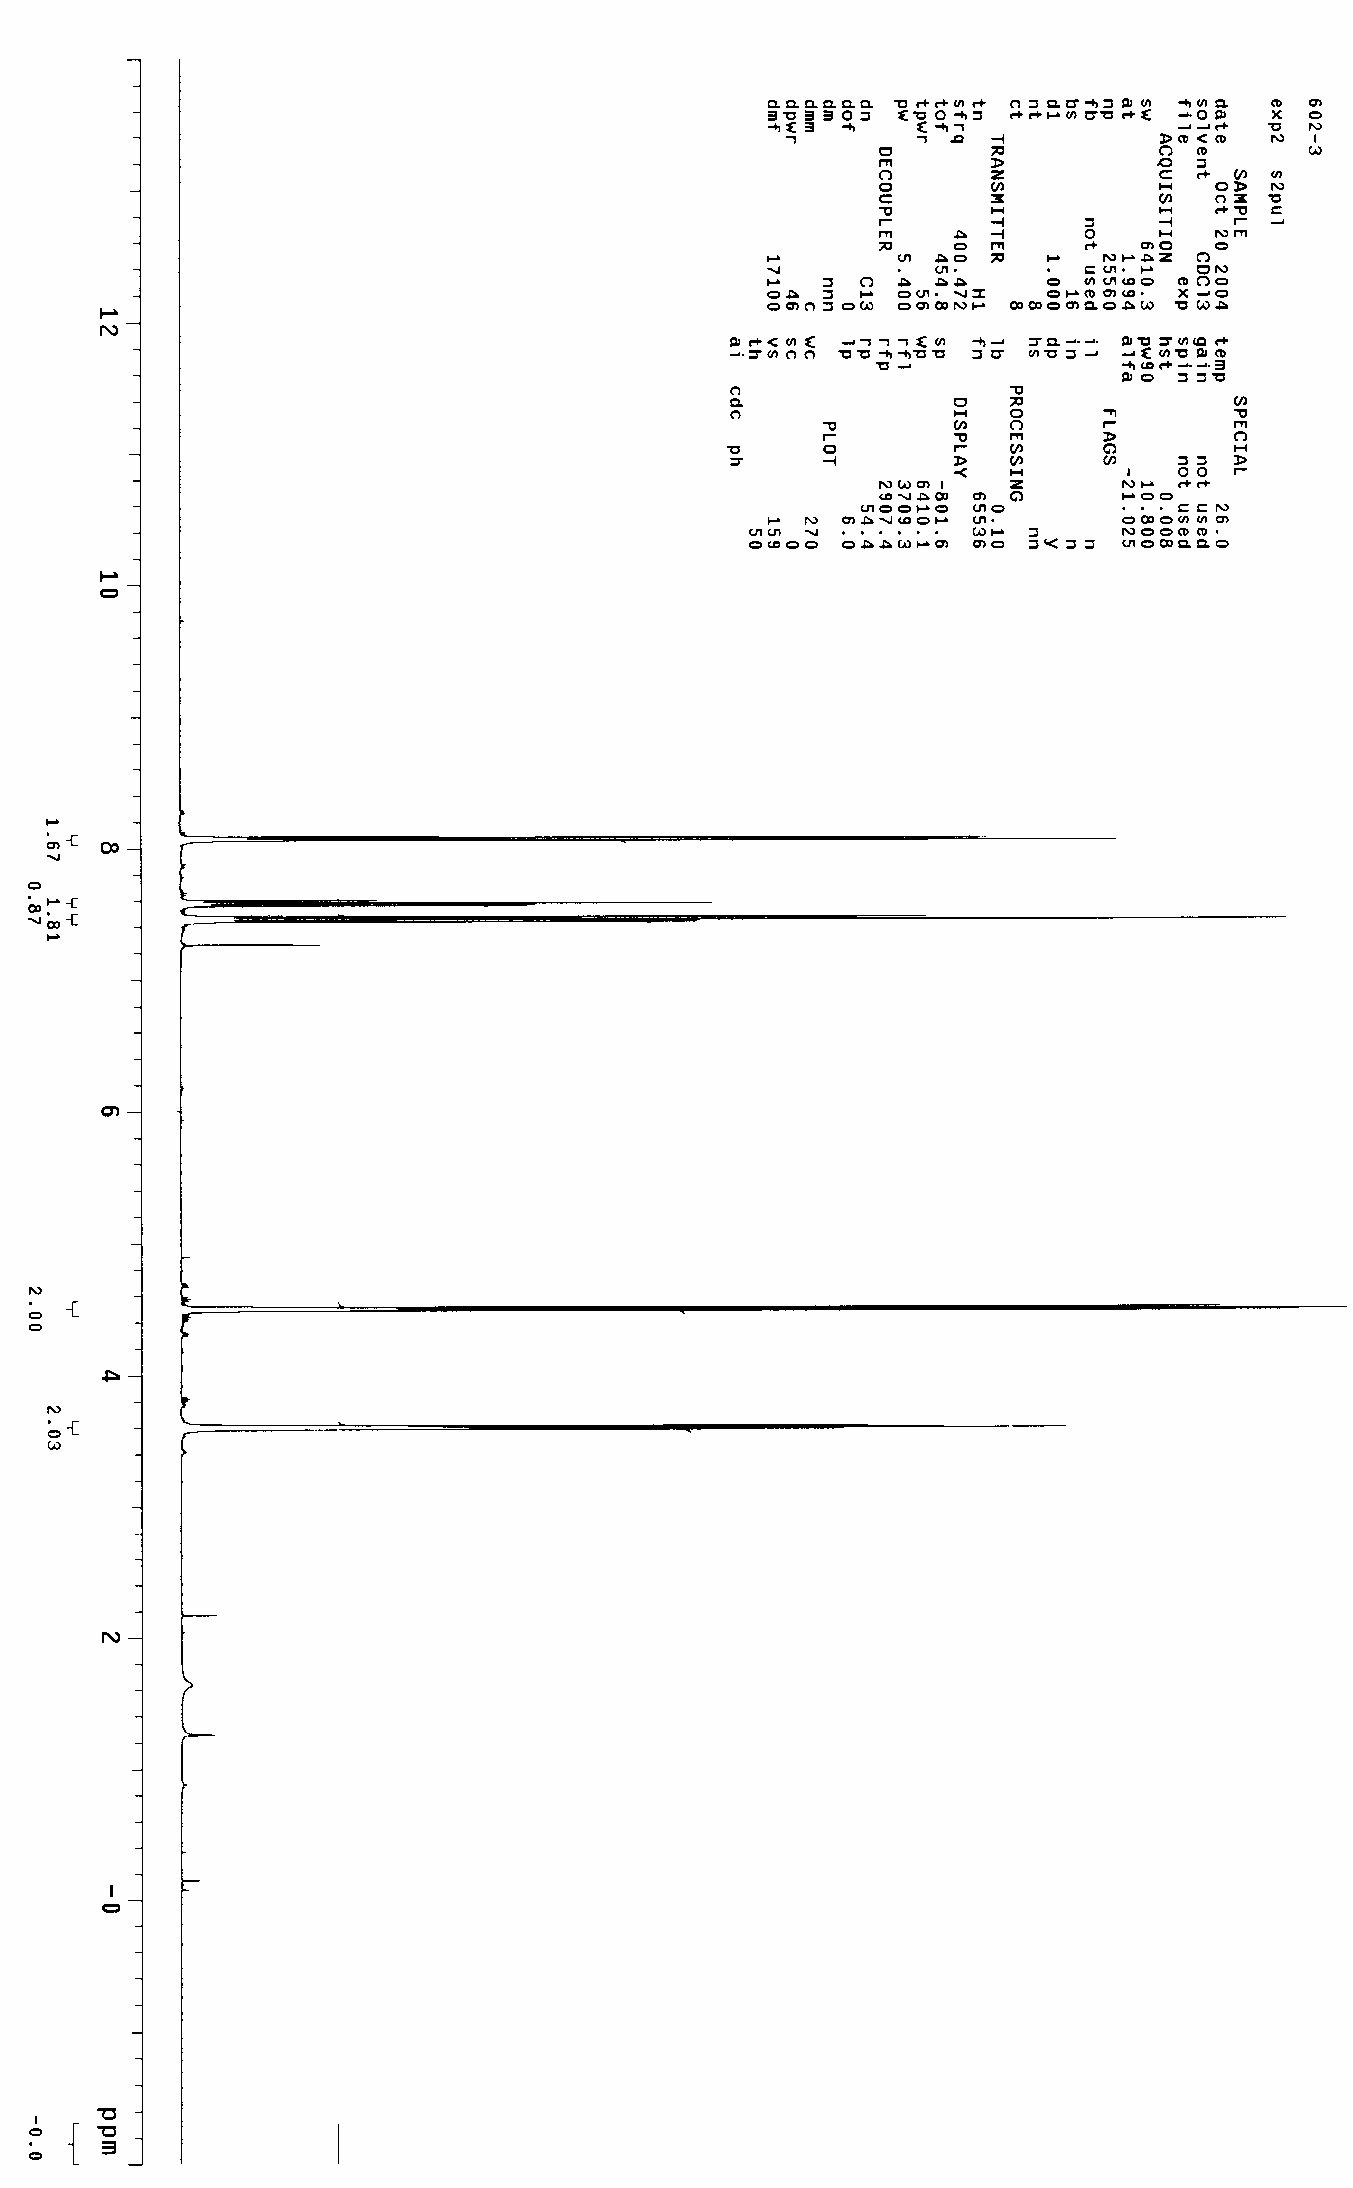


**44**
